# Beyond the greenhouse: coupling environmental and salt stress response reveals unexpected global transcriptional regulatory networks in *Salicornia bigelovii*

1 **Houda Chelaifa**<sup>1,5</sup>, **Manikandan Vinu**<sup>4</sup>, **Massar Dieng**<sup>4</sup>, **Youssef Idaghmour**<sup>4</sup>, **Ayesha Hasan**<sup>1,2,3</sup>,  
2 **and Hector H. Hernandez**<sup>1,2,5\*</sup>

3 <sup>1</sup>Department of Biomedical Engineering, Khalifa University, Abu Dhabi, United Arab Emirates

4 <sup>2</sup>Center for Membrane and Advanced Water Technology, Khalifa University, Abu Dhabi, United  
5 Arab Emirates

6 <sup>3</sup>Applied Genomic Laboratory, Khalifa University, Abu Dhabi, United Arab Emirates

7 <sup>4</sup>Program in Biology, New York University Abu Dhabi, Abu Dhabi, United Arab Emirates

8 <sup>5</sup>Microbial Environmental and Chemical Ecology Laboratory, Khalifa University, Abu Dhabi, United  
9 Arab Emirates

## 10 \* Correspondence:

11 Hector H. Hernandez

12 hector.hernandez@ku.ac.ae

13 **Keywords:** *Salicornia bigelovii*, plants, salt stress, food crop, transcriptomics, *de novo*,  
14 **metabolic regulation, environmental study**

## 15 Abstract

16 Soil salinity is an increasing threat to global food production systems. As such, there is a need for salt  
17 tolerant plant model systems in order to understand salt stress regulation and response. *Salicornia*  
18 *bigelovii*, a succulent obligatory halophyte, is one of the most salt tolerant plant species in the world.  
19 It possesses distinctive characteristics that make it a candidate plant model for studying salt stress  
20 regulation and tolerance, showing promise as an economical non-crop species that can be used for  
21 saline land remediation and for large-scale biofuel production. However, available *S. bigelovii*  
22 genomic and transcriptomic data are insufficient to reveal its molecular mechanism of salt tolerance.  
23 We performed transcriptome analysis of *S. bigelovii* flowers, roots, seeds and shoots tissues  
24 cultivated under desert conditions and irrigated with saline aquaculture effluent. We identified a  
25 unique set of tissue specific transcripts present in this non-model crop. A total of 66,943 transcripts  
26 (72.63%) were successfully annotated through the GO database with 18,321 transcripts (27.38%)  
27 having no matches to known transcripts. Excluding non-plant transcripts, differential expression  
28 analysis of 49,914 annotated transcripts revealed differentially expressed transcripts (DETs) between  
29 the four tissues and identified shoots and flowers as the most transcriptionally similar tissues relative  
30 to roots and seeds. The DETs between above and below ground tissues, with the exclusion of seeds,  
31 were primarily involved in osmotic regulation and ion transportation. We identified DETs between  
32 shoots and roots implicated in salt tolerance including *SbSOS1*, *SbNHX*, *SbHKT6* upregulated in  
33 shoots relative to roots, while aquaporins (AQPs) were up regulated in roots. We also noted that  
34 DETs implicated in osmolyte regulation exhibit a different profile among shoots and roots. Our study  
35 provides the first report of a highly upregulated HKT6 from *S. bigelovii* shoot tissue. Furthermore,

36 we identified two BADH transcripts with divergent sequence and tissue specific expression pattern.  
37 Overall, expression of the ion transport transcripts suggests Na<sup>+</sup> accumulation in *S. bigelovii* shoots.  
38 Our data led to novel insights into transcriptional regulation across the four tissues and identified a  
39 core set of salt stress-related transcripts in *S. bigelovii*.

## 40 **Introduction**

41 The global population is predicted to reach 9.7 billion people by 2050 (UN, 2019). Competition  
42 between the needs for nutritional foods and sustainable biofuels production is increasing food  
43 insecurity (Kline et al., 2017; Ghosh et al., 2019). In order to meet global food and energy demands,  
44 agriculture yields need to increase from 60% to 110%, but agricultural food production is estimated  
45 to experience more than 25% drop in yield (Jenks et al., 2007; Ray et al., 2013; Qadir et al., 2014).  
46 Currently, loss of crop productivity due to increase in soil salinity affects approximately 45 million  
47 hectares of agricultural land (Boyer, 1982; Bray et al., 2000; Mittler, 2006; Roy et al., 2014).

48 Salinity stress is harmful to plants, affecting plant growth and yields. High concentrations of salt is  
49 toxic to plants due to osmotic stress. It affects germination processes such as seed imbibition (Khan  
50 et al., 2000; Ahmad et al., 2017), increases formation of reactive oxygen species (ROS) that cause  
51 oxidative damage to proteins and DNA (Gill and Tuteja, 2010), and inhibits the activity of nucleic  
52 acid metabolism enzymes (Gomes-Filho et al., 2008). Salt-induced stress response in plants involves  
53 intricate regulation of a diverse set of metabolic processes that play vital roles in mitigating abiotic  
54 stresses (Flowers and Colmer, 2008; Munns and Tester, 2008; Rozema and Schat, 2013).

55 Increased salt stress affects plant's ability to regulate water and nutrients uptake from its environment  
56 while avoiding excessive accumulation of salt ions in its tissue. Osmotic stress induces expression of  
57 genes encoding antioxidants, ion channels (Wu et al., 2009), potassium transporters, vacuolar or  
58 plasma membrane Na<sup>+</sup>/H<sup>+</sup> (Zhang et al., 2008; Oh et al., 2009; Fan et al., 2013), vacuolar  
59 pyrophosphatases (Silva and Gerós, 2009), and proteins involved in defense functions and signal  
60 transduction (Zhu, 2002). In addition, plants synthesize a set of organic solutes, such as sugars,  
61 amino acids, and glycine betaine (GB), and accumulate inorganic ions in vacuoles to help maintain  
62 turgor (Hasegawa et al., 2000; Khan et al., 2000; Flowers et al., 2010). The synchronous process of  
63 gene expression and metabolite production allows plants to adjust to varying salinity stresses and  
64 thus maintains a positive turgor pressure.

65 To date, the molecular mechanisms of salinity response in crop plants are poorly understood due to  
66 the fact that there is a paucity of halophyte plant genomes and global transcriptome studies focusing  
67 on response to salt stress (Flowers et al., 2015). Understanding the mechanisms underlying salt  
68 tolerance and investigating the use of halophytes as food sources are key to addressing the predicted  
69 shortfalls in food production.

70 Developing halophyte crops for use in semi-arid regions where soils suffer from high salinity and  
71 water scarcity is a vital part of the effort to increase the mix of food crops. The *Salicornia* genus,  
72 commonly known as glasswort or sea asparagus, is a widespread extremely salt-tolerant succulent  
73 annual herb from the Chenopodiaceae family (Kadereit et al., 2006; Kadereit et al., 2007). It grows  
74 along seashores, colonizing new mud flat areas through prolific seed production (Glenn et al., 1997;  
75 Glenn et al., 1999). It is a leafless, succulent small-seeded saltmarsh plant considered a promising  
76 saline water crop (Glenn et al., 1992; Glenn et al., 1997; Zerai et al., 2010).

77 *S. bigelovii* shows great promise as a semi-arid saline crop for conserving freshwater, providing food,  
78 fodder, and producing biofuels (El-Mallah et al., 1994; Anwar et al., 2002; Warshay et al., 2017). It

79 displays high seed yield, which can contain greater than 30% edible oil, and high biomass production  
80 under seawater irrigation (Glenn et al., 1998). Currently, *S. bigelovii* is commercially cultivated as a  
81 minor vegetable for the United States and European fresh produce markets. It is one of the world's  
82 first terrestrial crops produced exclusively under seawater irrigation in several large projects (Glenn  
83 et al., 1992; Glenn et al., 2013).

84 Generally, transcriptomic studies of abiotic stress response in plants are performed in the laboratory  
85 or in greenhouses under strictly controlled conditions. These studies center on understanding plant  
86 response under a singular condition using a single snapshot in time to investigate the differential  
87 transcriptome in response to saline stress. In addition, they concentrate on specific plant tissues, such  
88 as root and shoots (Fan et al., 2013). Unfortunately, this approach does not reflect the real-life  
89 conditions that plants face in the field (Atkinson and Urwin, 2012; Ramegowda and Senthil-Kumar,  
90 2015; Pandey et al., 2017). Conducting transcriptome studies under controlled conditions can  
91 overlook the combined effects of other environmental factors, such as heat stress and salinity, in  
92 modulating the global transcriptome response of plants to abiotic stresses (Pandey et al., 2017).

93 There are several key adaptive traits specific to *S. bigelovii* that allow it to germinate, mature, and  
94 complete its life cycle under saline conditions (Yuan et al., 2019). The effects of salt stress are felt in  
95 all growth phases of *S. bigelovii* throughout multiple metabolic, molecular, and physiological  
96 processes (Rivero et al., 2014; Negrão et al., 2016; Salazar, 2017).

97 Here, we (1) generated global tissue-specific (flowers, roots, seeds and shoots) *S. bigelovii*  
98 transcriptomes from plants grown in a test facility under varying environmental conditions and saline  
99 aquaculture effluent irrigation, (2) identified transcripts differentially expressed in *S. bigelovii*  
100 tissues, (3) characterized a core set of salt stress-related transcripts, and (4) studied *S. bigelovii*'s  
101 metabolic responses implicated in salt stress adaptation and osmolyte production induced by growth  
102 under saline aquaculture effluent. The understanding of global transcriptome response to salt stress is  
103 key if we are to elucidate the underlying mechanisms of salt stress response in both halophytes and  
104 other crop plants. These data represent the first global transcriptome of salinity stress response in *S.*  
105 *bigelovii*. One novel finding in our study is the identification of previously unreported tissue  
106 expression patterns of salt stress response transcripts, such as HKT6m SOS1, and NHX. These  
107 results offer novel insights into the modes of transcriptional and metabolic regulation that can  
108 potentially be exploited to facilitate the development and selective breeding of crops with increased  
109 tolerance to salt stress.

## 110 **Materials and Methods**

### 111 **Seawater Energy and Agriculture System field station**

112 The Seawater Energy and Agriculture System (SEAS) pilot facility (Supplementary Figure S1) is an  
113 integrated aquaculture, halo-agriculture, and mangrove silviculture system located at the Khalifa  
114 University, Masdar City Campus, Abu Dhabi, United Arab Emirates. The facility uses sea water  
115 aquaculture ponds to breed fish and shrimp with the aquaculture effluent flooding *S. bigelovii* fields  
116 twice per day, mimicking tidal flows. The SEAS pilot facility experiences large annual fluctuations  
117 in environmental conditions with average maximum air temperature of 25.9°C in January to 44.1°C  
118 in August and with the majority of the rainfall occurring between December and March (Statistics  
119 Center, 2018). Sea effluent water was analyzed by Ion chromatography IC-5000 (Dionex ICS-5000,  
120 ThermoFisher) with separator column (3X100) to analyze cations and ions concentration.

### 121 **Plant material and RNA extraction**

122 *S. bigelovii* cultivar ‘Boca Chica’ (Arizona University, Tucson, Arizona, USA) seeds were selected  
123 and grown under environmental conditions at the SEAS pilot facility. Four *S. bigelovii* plant tissue,  
124 namely flowers (F), roots (R), seeds (G), and shoots (S) (Supplementary Figure S2), were collected  
125 from randomly selected individual plants from the same field area, immediately frozen on site in  
126 liquid nitrogen, transferred to the laboratory, and stored at -80°C for downstream analysis.

127 Total RNA was extracted from three biological replicates of each of the four tissues using the  
128 RNeasy Plant Mini kit (Qiagen, Venio, Netherlands). The purity of RNA samples (RNA Integrity  
129 Number > 8) was confirmed using a Bioanalyser RNA Chip 2100 (Agilent Technologies, Santa  
130 Clara, CA, USA) and quantified using a Qubit 4 Fluorometer (Invitrogen, Carlsbad, CA, USA).

### 131 **cDNA library preparation and next-generation sequencing (NGS)**

132 All cDNA libraries were constructed using the TruSeq Stranded mRNA Library Prep Kit (Illumina,  
133 San Diego, CA, USA) following the manufacturer's protocols. Enrichment of mRNA from total RNA  
134 was performed using poly-T attached magnetic beads followed by enzymatic fragmentation and  
135 cDNA synthesis using Superscript II Reverse Transcriptase (Thermo Fisher, Waltham, MA, USA).  
136 cDNA samples were purified using AMPure XP beads (Agencourt Bioscience, Beverly, MA, USA)  
137 followed by adapter and barcode ligation, A-tailing, and amplification as recommended by the  
138 manufacturer. The resultant cDNA libraries were subjected to 250 bp paired-end sequencing using an  
139 Illumina Hi-Seq 2500 platform (Illumina, San Diego, CA, USA).

### 140 **Global analysis, *de novo* assembly, and visualization of RNA reads**

141 Transcriptome reads data were processed to remove adapter sequences, low quality reads (QV < 30  
142 Phred score), and reads of length below 36 bp using the program Trimmomatic v0.32 (Bolger et al.,  
143 2014). The quality of the trimmed reads was assessed using FastQC 0.11.4 (Andrews, 2010). Quality  
144 control of the raw data resulted in retaining high-quality transcriptome data of 190,227,720 paired-  
145 end reads for all tissues. We performed *de novo* assembly of the trimmed reads using the assembler  
146 Trinity (V2.2.0) (Grabherr et al., 2011). Transcript quantification was done via the utility script  
147 ‘align\_and\_estimate\_abundance.pl’ bundled in the Trinity toolkit using default values with the  
148 alignment and estimation methods set to Bowtie2 and RSEM, respectively. Assembled transcripts  
149 with a minimum length of 200 bp and expression levels of 5 (FPKM) were retained for downstream  
150 analysis. The non-redundant transcripts were further clustered using CDHIT-EST at 95% identity.

151 Unsupervised statistical analysis and two-way hierarchical clustering was used to plot global gene  
152 expression patterns using the JMP Genomics software (SAS Institute, Cary, NC, USA) using log-  
153 transformed normalized transcript abundance values. All RNA sequencing data for the replicates and  
154 four tissues (R, S, F, and G) have been deposited at the NCBI in the Short Read Archive database  
155 (Bioproject ID: PRJNA607385, Biosample ID: SUB6825665).

156

### 157 **Differential gene expression analysis**

158 FPKM (Fragments Per Kilobase of transcript per million mapped reads) values were calculated to  
159 measure the expression level of each assembled transcript sequence. This method eliminates the  
160 influence of varying transcripts lengths and sequencing depth on the calculation of transcript  
161 expression. Differential expression analysis was performed using count data and DESeqv1.8 based

162 on the negative binomial distribution model. Significant differential expression was inferred based on  
163 a false discovery rate (FDR) of 5% and a log<sub>2</sub> fold change  $\geq 2$ .

## 164 **Functional gene annotations, gene ontology, and pathway analysis**

165 Assembled transcripts with a minimum length of 200 bp and expression levels (FPKM) of 5 were  
166 used for downstream analysis using Blast2GO v4.1.9 (Götz et al., 2008) to identify the GO terms  
167 associated with biological processes (BPs), molecular functions (MFs), and cellular components  
168 (CCs) (<https://www.blast2go.com/blast2go-pro>). All putative transcripts were searched against the  
169 NCBI database (nr) (<ftp://ftp.ncbi.nih.gov/blast/db/> 29-02-2015), UniProt database (Consortium,  
170 2018), Kyoto Encyclopedia of Genes and Genomes (KEGG) (Kanehisa and Goto, 2000), Gene  
171 Ontology (GO) (Ashburner et al., 2000; The Gene Ontology Consortium, 2018), EggNOG 5.0  
172 (Huerta-Cepas et al., 2016) and InterProScan (Madeira et al., 2019) using Basic Local Alignment  
173 Search Tool (BlastX) with an E-value cut-off set to  $10^{-3}$  and a minimum number of hits of 10. Only  
174 the top hit from the BlastX search were used for downstream analysis.

## 175 **Quantitative PCR**

176 Nine transcripts implicated in salt stress response were selected for quantitative real-time PCR (qRT-  
177 PCR) validation. The qRT-PCR was performed as previously described (Wang et al., 2016). First-  
178 strand cDNA was synthesized using a PrimeScript RT reagent kit followed by qRT-PCR using  
179 SYBR Green qPCR Master Mix on a StepOnePlus Real-Time PCR instrument (Thermo Fisher  
180 Scientific, Waltham, MA, USA) following the manufacturers' protocols. *GADPH* was used as the  
181 reference gene in accordance with previous methods (Hao et al., 2014). The transcript primers used  
182 are listed in Supplementary Table S2. Relative gene expression levels were calculated using the  
183  $2^{-\Delta\Delta CT}$  method (Livak and Schmittgen, 2001), and the data are presented as the mean  $\pm$  SD from  
184 three independent biological replicates.

## 185 **Results**

### 186 **Environmental conditions at SEAS field station during tissue sampling**

187 The SEAS field station, located in Masdar City, Abu Dhabi, is designed to assess environmental  
188 parameters that can affect crops production scale systems for saline agriculture. The meteorological  
189 parameters at the SEAS field station track the annual fluctuations typically experienced in Abu Dhabi  
190 (Supplementary Figure S3A ([www.Average-Weather-at-Abu-Dhabi-International-Airport-United-Arab-Emirates](http://www.Average-Weather-at-Abu-Dhabi-International-Airport-United-Arab-Emirates))). Salinity of the aquaculture effluent used to irrigate *S. bigelovii* fields ranged from  
191 32.4 g L<sup>-1</sup> in March to 42.5 g L<sup>-1</sup> in August. The constant relative low water salinity in the first period  
192 of growth (March-April 2017) as compared to the high salinity in the second period of growth (July-  
193 August) can be attributed to the rainy days in late winter and early spring as well as higher mean air  
194 temperature and evaporation in summer (Supplementary Figure S3C). The effluent sea water ion  
195 content over the measured period varied slightly with salinity increase. In general, we observe a trend  
196 of high concentration of Na<sup>+</sup> (11.7 g L<sup>-1</sup> to 16.9 g L<sup>-1</sup>), K<sup>+</sup> (0.53 g L<sup>-1</sup> to 0.65 g L<sup>-1</sup>), and Cl<sup>-</sup> (18.7 g L<sup>-1</sup>  
197 to 21.9 g L<sup>-1</sup>) (Supplementary Table S1).

199 A total of twelve *S. bigelovii* plants tissue samples representing roots (R1, R2, R3), shoots (S1, S2,  
200 S3), flowers (F1, F2, F3), and seeds (G1, G2, G3) tissue were collected between March 2017 and  
201 August 2017 from plants grown at the SEAS facility. Shoots and roots were collected in March 2017  
202 from the same plant, while flowers and seeds were collected in July and August 2017, respectively.

203 These tissues were used to investigate the transcriptome of *S. bigelovii* plants in response to growth  
204 under environmental conditions.

## 205 **Sequencing and *de novo* assembly of the *S. bigelovii* transcriptome**

206 Differential expression analysis without a reference annotated genome is challenging. Nowadays  
207 however, this analysis is possible using data with sufficient sequencing depth and *de novo*  
208 transcriptome analysis approaches (Pucker and Schilbert, 2019). Deep *S. bigelovii* transcriptomic  
209 data was generated and subjected to *de novo* transcriptome analysis. A total of 226,274,905 raw reads  
210 for all the libraries processed were generated using the Illumina HiSeq platform. Quality control  
211 using FastQC (Andrews, 2010) resulted in retaining 190,227,730 reads (88%) with GC content of  
212 45.28% (Table 1). All sequencing data generated have been deposited in the NCBI database under  
213 the NCBI SRA accession number PRJNA607385.

214 The roots, shoots, flowers, and seeds libraries produced 48,398,048, 47,133,647, 43,459,494, and  
215 51,236,541 reads (quality scores greater than Q20), respectively (Figure 1). The *de novo* assembly  
216 yielded 643,752 high-quality transcripts of length between 200 bp and 2,627 bp with an N50 of 722  
217 bp (Table 1, Figure 1A). The redundant transcripts represented less than 20% of the total reads as  
218 analyzed by CD-HIT-EST (Fu et al., 2012) using a 95% identity cutoff.

## 219 **Functional annotation and classification**

220 Assembled transcripts with a minimum length of 200 bp and expression levels of 5 (FPKM) in at  
221 least 2 biological replicates per tissue type were retained for downstream analysis. The resultant  
222 66,943 transcripts were submitted for annotation using the Blast2GO program. Based on this criteria,  
223 48,622 transcripts (72.63%) were matched in the GO database, 39,882 (59.56%) in the InterPro  
224 database, and 9,424 (14.07%) in the KEGG database (Figure 1C).

225 Since there are no reference *Salicornia* species genomes available in public databases, we compared  
226 the *S. bigelovii* transcripts against the complete NCBI database using BLAST. The total number of  
227 BLAST top hit sequences was 66,943, with 48,613 of these sequences assigned to a known species  
228 (Figure 2). Assessment of the distribution of the top-hit species from this analysis showed that 18,936  
229 transcripts (38.94%) had high homology with genes from *Beta vulgaris maritima*, followed by *S.*  
230 *oleracea* (9,692 transcripts, 19.93%) and *Vitis vinifera* (146 transcripts, 3.03%), while 17,029  
231 transcripts had high homology with sequences from other organisms (Figure 2). A total of three  
232 fungal endophytes, namely; *Hortaea werneckii* (4,021 transcripts, 6%), *Rachicladosporium* sp.  
233 (3,096 transcripts, 4.62%), and *Acidomyces richmondensis* (592 transcripts, 0.8%) were detected.

234 All transcripts identified were subject to the GO classification. A total of 66,943 Trinity-assembled *S.*  
235 *bigelovii* transcripts were assigned GO terms. A total of 133,971 annotations were identified from the  
236 BLAST results (Figure 3A). Based on sequence homology with genes of known function, these  
237 transcripts could be assigned to one or more ontologies, with 35% of transcripts assigned to a  
238 biological process (BP), 26% of transcripts assigned to a cellular component (CC), and 39% of  
239 transcripts assigned to a molecular function (MF) category (Figure 3). For BPs (Figure 3B), a  
240 maximum number of transcripts (20,250 transcripts) were associated with plant metabolic processes  
241 followed by cellular processes (17,715) and single-organism process (12,560). Additional transcripts  
242 identified implicate response to stimulus (3,145), signaling (1,081), developmental process (976),  
243 reproductive process (579), immune system process (95), rhythmic process (20), locomotion (24),  
244 biological adhesion (20), and cell killing activity (6). For MFs, transcripts were associated with  
245 catalytic activity (18,089) and binding (16,613) followed by genes of transporter (2,637) and

246 structural molecular activity (2,308). Other transcripts related to MF included molecular function  
247 regulation (425), transcription factor to nucleic acid binding (403), transcription factor to protein  
248 binding (157), electron carrier nutrient reservoir (64), and metallochaperone activity (5). CCs  
249 implicated (Figure 3B) include cell part (15,344), membrane function (12,005), and membrane part  
250 (9,965) followed by organelle part (5,673) and extracellular region (569). Other transcripts have been  
251 annotated as implicated in cell junction (197), nucleoid (157), and virion (91).

252 The pooled set of *S. bigelovii* transcripts were mapped against the InterPro database  
253 (<http://www.ebi.ac.uk/interpro/>) and assigned to 39,882 (21.4%) transcripts associated with 4,281  
254 unique InterPro Families (Figure 4). The highest represented families were triphosphate hydrolase  
255 (1,089), protein kinase-like (918), and the alpha/beta hydrolase (ABH) superfamily (422) domains  
256 followed by the MFS transporter superfamily (387) and WD40/YVTN (410) domains. In addition,  
257 we identified transcripts involved in sugar transport (133), aquaporin transporter processing families  
258 (32), membrane transportation families (22), potassium transporter (21), Mg<sup>2+</sup> transporter protein  
259 (12), and Na<sup>+</sup>/Ca<sup>+2</sup> exchanger membrane region (7).

### 260 ***S. bigelovii* transcript expression analysis**

261 For the differential expression analysis, the assembled transcript dataset identified as plant transcripts  
262 (49,914 transcripts) was used as an annotation reference when comparing transcripts from different *S.*  
263 *bigelovii* tissues. Differentially expressed transcripts (DETs) in roots, shoots, flowers, and seeds were  
264 identified using DESeqv1.8 for each tissue pairwise comparison. Transcripts were considered  
265 significantly differentially expressed based on a FDR of 5% and  $\log_2 |FC| > 2$ . Also, pairwise  
266 differential expression analysis of aerial plant tissues (shoots, seeds and flowers) transcripts  
267 compared to roots transcripts revealed up to 13,245 DETs depending on the comparison. The  
268 comparison between seeds and roots exhibited the highest number of DETs.

269 Hierarchical clustering of transcript abundance values of DETs between the four plant tissues shows  
270 the patterns of tissue-specific gene expression profiles that are clustered into four groupings (Figure  
271 5). Overall and as expected, shoot profiles are more similar to flower profiles relative to root profiles  
272 while seed tissue expression is the most distinct from the other tissues. Transcripts cluster into four  
273 major groups (Clusters 1-4, Figure 5) that reflect the patterns of expression tissue specificity.  
274 Transcripts belonging to Cluster 1 are significantly up-regulated in seed tissue relative to shoot, root,  
275 and flower tissues (Cluster 1; 16,100). Cluster 2 (10,889) is enriched with transcripts up-regulated in  
276 flower and shoot tissues relative to root and seed tissues. A large set of transcripts in Cluster 4 were  
277 highly up-regulated in root tissue (Cluster 4; 11,681) relative to shoot tissue. Cluster 3 (11,244) on  
278 the other hand, is enriched with DETs with no clear visual pattern of tissue specific up- or down-  
279 regulation specific to a given tissue.

280 A total of 3,362 transcripts were found commonly expressed in roots, shoots and seeds tissues while  
281 1,261 were specifically differentially expressed in root and shoot, 1,101 specifically expressed in root  
282 and seed and 8,311 specifically differentially expressed in root and seed (Figure 6A). The number of  
283 DETs was highest between roots and aerial plant tissues (shoots, seeds and flowers) (Figure 6B). As  
284 expected, a relatively small number of DETs was identified between shoot and flower tissues with  
285 only 273 DETs down-regulated and 948 DETs up-regulated in shoot tissues.

286 A total of 7,273 transcripts were differentially expressed between root and flower tissue, of which  
287 5,452 were down-regulated and 1,821 up-regulated in root tissue. We identified 13,245 DETs  
288 between root and seed tissues, with 8,586 being down-regulated and 4,659 being up-regulated in root

289 tissue. Moreover, we identified 7,227 DETs between root and shoot tissues, of which 4,345 were  
290 down-regulated and 2,882 were up-regulated in root tissue (Figure 6B).

## 291 **Gene ontology analysis and identification of potential salt tolerance transcripts in shoots and** 292 **roots**

293 Previous work analyzed the global transcriptome profile in *Salicornia europaea* roots and shoots  
294 (Furtado et al., 2019). This work done in very different conditions that those experienced in Abu  
295 Dhabi. In order to understand the metabolic response of *S. bigelovii* to the extreme environmental  
296 stresses in Abu Dhabi, we performed an in-depth GO functional analysis of DETs between root and  
297 shoot tissues. All DETs were grouped into 48 GO classes belonging to 15 CC terms, 12 MF terms,  
298 and 21 BP terms, (Figure S4). Similar GO distribution was observed for up-regulated and down-  
299 regulated transcripts in root as compared to shoot tissues. For BPs, metabolic process and cellular  
300 processes were the highest differentially expressed terms; we also took notice of the high number of  
301 transcripts belonging to response to stimulus (410) upregulated in roots. For MF, the two most  
302 expressed transcripts were related to catalytic activity and binding with transporter activity while for  
303 CC, the highest differentially expressed terms were cell, cell part and organelle (Figure S4).

304 Among transcripts involved in transport activity (GO:0005215) and response to stimulus  
305 (GO:0050896), we identified essentially three aquaporin transcripts: two encoding tonoplast  
306 membrane aquaporins (TIP) (TRINITY\_DN208648, TRINITY\_DN200599) and one encoding  
307 plasma membrane aquaporin (PIP) (TRINITY\_DN209082, K09872) that were up-regulated in root as  
308 compared to shoot tissues (FDR < 5%; log<sub>2</sub> FC = 8.43 and FDR < 5%; log<sub>2</sub> FC = 2.54, respectively)  
309 (Figure 7).

310 Transcripts encoding vacuolar H<sup>+</sup>-pyrophosphatase (H<sup>+</sup>-PPase) (TRINITY\_DN206459-K23025)  
311 were also upregulated in root tissue during sea effluent water irrigation. However, transcripts  
312 associated with salt oversensitive stress (SOS1) (TRINITY\_DN220726) exhibited higher expression  
313 in shoot tissue when compared to the roots.

314 A considerable number of DETs (GO:0005215; 398 transcripts) encoding for a diversity of ion  
315 transporters such as sodium antiporter, calcium and potassium transporter were found to be up-  
316 regulated in shoot relative to root tissues. The predicted antiporter NHX4 (TRINITY\_DN207378)  
317 and the transcript encoding for the high affinity potassium transporter, HKT6  
318 (TRINITY\_DN119119) were highly upregulated in shoots compared to roots (FDR < 5%; log<sub>2</sub> FC =  
319 3.82 and FDR < 5%; log<sub>2</sub> FC = 6.48, respectively). The Na<sup>+</sup>/H<sup>+</sup> antiporter NHX1  
320 (TRINITY\_DN224256), the predicted antiporter NHX2 (TRINITY\_DN221143) and the Ca<sup>2+</sup>  
321 transporting ATPase (TRINITY\_DN110967) are also up-regulated in shoots (FDR < 5%; log<sub>2</sub> FC =  
322 2.82 and FDR < 5%; log<sub>2</sub> FC = 2.79, respectively).

323 Several DETs encoding for proteins involved in the synthesis and metabolism of osmolytes such as  
324 proline and glycine betaine were identified. We highlight in particular two transcripts encoding for  
325 two enzymes in the glycine betaine pathway: the betaine aldehyde dehydrogenase (BADH)  
326 (GO:0008152, TRINITY\_DN226919, FDR < 5%; log<sub>2</sub> FC = 2.31) and the choline monooxygenase  
327 (CMO) (TRINITY\_DN213512, FDR < 5%; log<sub>2</sub> FC = 2.01) upregulated in shoots relative to roots.  
328 Interestingly, another transcript encoding for BADH (TRINITY\_DN231325) was highly upregulated  
329 in root tissues (FDR < 5%; log<sub>2</sub> FC = 3.59). In addition, we found transcripts mapping to the proline  
330 metabolism pathway (IPRO 18800). We identified the Δ-pyrroline-5-carboxylate synthetase (P5CS)



331 (TRINITY\_DN223373) transcript and the proline-rich protein (PRP) (TRINITY\_DN218724) to be  
332 upregulated in shoots (FDR < 5%; log<sub>2</sub> FC = 2.07, FDR < 5%; log<sub>2</sub> FC = 2.44, respectively).

333 Transcription factors (TFs) play vital roles in regulating plant resistance mechanisms under abiotic  
334 stress. Based on the GO term (GO: 0001071), 175 DETs were identified as nucleic acid binding and  
335 TFs with the majority of the transcripts being up-regulated in root tissue. The most abundant classes  
336 of up-regulated TFs in roots included WRKY (TRINITY\_DN192570, TRINITY\_DN221294) (FDR  
337 < 5%; log<sub>2</sub> FC = 7.1 and FDR < 5%; log<sub>2</sub> FC = 7.99, respectively) while MYB  
338 (TRINITY\_DN155341, TRINITY\_DN190623) (FDR < 5%; log<sub>2</sub> FC = 3.92 and FDR < 5%; log<sub>2</sub> FC  
339 = 3.32, respectively) TFs were up-regulated in shoots.

## 340 **Evaluation and validation of selected genes using qRT-PCR**

341 We performed qRT-PCR to validate the relative changes in transcript levels observed in the  
342 transcriptome data. Nine genes randomly selected from transcriptome reads exhibiting differential  
343 expression patterns in the *de novo* assembly analysis were compared with the data obtained by qRT-  
344 PCR (Figure 8). The qRT-PCR data revealed similar relative expression trends between the selected  
345 *de novo* assembly transcripts. For example, the SOS1, the P5PR, and NHX1 genes displayed the  
346 same relative levels of expression in both the qRT-PCR and transcriptome data. These genes were  
347 up-regulated in the shoot as compared to root tissues. The aquaporins (AQPs), H<sup>+</sup>-PPase, and glycine  
348 betaine genes also showed the same relative expression patterns in both the qRT-PCR and *de novo*  
349 transcriptome data: they were down-regulated in shoot relative to root tissues. Overall, we observed  
350 some variability in DETs between the qRT-PCR data and the *de novo* transcriptome data.

## 351 **Discussion**

352 Soil salinity is the primary environmental factor affecting agriculture and crop productivity (Flowers  
353 and Colmer, 2008; Zörb et al., 2019). The lack of water along with a rise in thermal stress are  
354 anticipated to worsen, thus further reducing agriculture productivity. Halophyte plant crop plants  
355 offer an opportunity to diversify and augment agriculture productivity (Panta et al., 2014).  
356 Unfortunately, our understanding of the global molecular mechanisms underlying high salt tolerance  
357 in halophyte plants under environmental stress is limited in part due to scarcity of genomic and  
358 transcriptional studies. The true halophyte plant *S. bigelovii* exhibits high salt tolerance typical of its  
359 natural environment (Kadereit et al., 2007). This plant offers a unique opportunity to study the global  
360 transcriptional response to high salt stress in salt tolerant plants.

361 One barrier to understanding the global plant response to its environment is the lack of transcriptional  
362 data from multiple tissues as they respond to environmental stresses over the course of plant growth  
363 and maturation cycle.

364 Furtado et al. investigated the DETs between shoots and roots of *S. europaea* in at two sites, Spa  
365 Park (site 1) and Ciechocinek (site 2) in central Poland where the environmental conditions are much  
366 different than those experienced in Abi Dhabi (Furtado et al., 2019). The average monthly  
367 temperature was between 1.5°C and 22.1°C at site 1 and -2.6°C and 17.8°C at site 2 in January and  
368 August respectively whereas the average monthly temperature in Abu Dhabi ranged from 23.9°C in  
369 January to 41.1°C in August (Statistics Center, 2018). The annual precipitation was 379.4 mm at site  
370 1 and 680.2 mm at site 2, as compare to 23 mm in Abu Dhabi. Site salinities were much lower at  
371 their sites (9.2 ppt to 21.5 ppt and 7.4 ppt and 11.8 ppt in spring and fall) than those in Abu Dhabi  
372 (34.6 ppt and 42.6 ppt in March and August).

373 *S. bigelovii* plants grown at the SEAS pilot facility were exposed to the annual environmental  
374 conditions, such as temperature, humidity, salinity and length of day, between the Abu Dhabi winter  
375 and late summer seasons. These conditions represent varying physical stresses experienced by plants  
376 through the stages of growth and maturation.

377 We have used RNA sequencing and performed a transcriptome analysis to study the global gene  
378 expression profiles in four tissues of *S. bigelovii* under saline environmental conditions. To our  
379 knowledge, this represents the first global transcriptome data available for *S. bigelovii*.

### 380 ***De novo* assembly and analysis**

381 One major advantage of RNA-Seq analysis is its capacity to identify previously unknown transcripts  
382 through *de novo* assembly. We identified a total of 66,943 transcripts after *de novo* assembly, of  
383 which 72.63% were successfully annotated in the GO database. The results show a total of 18,321  
384 transcripts classified as “Others” (27.38%) with no matches to known transcripts. These unknown  
385 transcripts may represent novel *S. bigelovii* transcripts some of which might be involved in the  
386 mechanisms of salt tolerance.

387 The BLAST results show that *B. vulgaris maritima* had the highest number of identified transcripts.  
388 This result is as expected as *B. vulgaris maritima* is closely related to *S. bigelovii*. The next species  
389 identified by BLAST is *S. oleracea*. These two species accounts for more than 58% of all top-species  
390 hits. Additionally, our analysis indicated the presence of transcripts of non-plant origin, mainly  
391 coming from bacteria and fungi.

392 We expected to identify non-plant transcripts as plants colonized by endophytes often display  
393 increased tolerance to abiotic stresses such as salinity and drought (Singh et al., 2011). It has been  
394 shown that endophytes actively colonize plants, interact with their host, and frequently show  
395 beneficial effects on plant growth and health (Vaishnav et al., 2019). Still, the mechanisms of plant-  
396 endophyte interaction and fungal adaption to the plant environment are poorly understood. These  
397 data allude to the identity and metabolic processes between plants and endophytes.

398 After removal of transcripts belonging to non-plant organisms, we were left with 49,914 transcripts  
399 for the analysis of *S. bigelovii* DETs. Our data provides the first resource for global gene  
400 identification and regulation analysis in *S. bigelovii* and other strict halophytes.

### 401 **Global differentially expressed transcripts analysis**

402 Plants subjected to salt stress display complex metabolic interactions between signal transduction  
403 networks, transcriptional regulation, and stress gene expression (Deinlein et al., 2014). We identified  
404 a set of DETs that were significantly upregulated in the above ground plant tissues (shoot, seed, and  
405 flower) relative to the underground tissue (root) (Figure 6). The analysis identified several key stress  
406 response DETs in specific tissues that were not previously reported in the literature. We focused on  
407 comparing DETs between shoot and root tissues to identify genes known to be associated with salt  
408 tolerance in the halophyte *S. bigelovii*. Using qRT-PCR, the RNA-Seq results for 9 randomly  
409 selected salt stress-associated genes were validated. The qRT-PCR results agreed with the overall  
410 differential expression trends observed in the transcriptome analysis. Future characterization of the  
411 role of specific transcripts is required to develop a better understanding of the relationship between  
412 environmental stresses and gene expression and regulation profiles in *S. bigelovii*.

### 413 **Growth and ion balance under agricultural effluent water**

414 Salinity and drought stress reduces water transport rates across membranes (Osakabe et al., 2014).  
415 The uptake of water by plants is highly dependent on regulation of AQPs (Maurel et al., 2015).  
416 AQPs are transmembrane proteins that facilitate uptake of soil water and regulate root hydraulic  
417 conductivity. They are also involved in cellular compartmentalization of water and are thought to  
418 play a role in maintaining osmosis and turgor of plant cells in halophytes (Berger et al., 2010).

419 There is still much debate regarding salt dependent regulation of AQPs. For instance, even though  
420 *Kochia sieversiana* can subsist at high salinity, most AQP genes were significantly up-regulated in  
421 low, but not high salinity stressed roots (Zhao et al., 2017). In contrast, the halophyte *Schrenkiella*  
422 *parvula* expressed a high number of AQPs for tolerance to salt toxicity with TIP2 being highly  
423 expressed in *S. parvula* root as compared to shoot tissues (Loqué et al., 2005; Oh et al., 2014). Our  
424 analysis shows that TIPs (TIP1 and TIP2) were significantly up-regulated in roots of *S. bigelovii*  
425 when compared to previous halophyte literature (Salazar, 2017). This presents tantalizing data that  
426 suggest multiple pathways for regulation of AQPs in halophytes.

427 Cellular ion transport across the tonoplast into vacuoles is maintained by the proton motive force  
428 (PMF) generated by the vacuolar H<sup>+</sup>-PPase (Gaxiola et al., 2007). It has been reported that both the  
429 H<sup>+</sup>-PPase and V-ATPase transport activity in *S. bigelovii* (Ayala et al., 1996) increased upon the  
430 addition of NaCl to the growth medium. We observed that *SbH*<sup>+</sup>-PPase is also upregulated in root as  
431 compared to shoot tissues.

432 Up-regulation of AQPs and H<sup>+</sup>-PPases is counterbalanced by high expression of several monovalent  
433 ion transporters. These ion transporters regulate Na<sup>+</sup>, K<sup>+</sup>, and Cl<sup>-</sup> transport, which are necessary for  
434 increased salt tolerance. The ion transport counterbalance is undertaken by vacuolar membrane  
435 Na<sup>+</sup>/H<sup>+</sup> exchangers (NHX) and is driven by the intracellular electrochemical gradient of protons  
436 membrane, or NHX1 in the tonoplast. We identified three *SbNHX* genes homologous to NHX genes  
437 found in *S. oleracea*, *B. vulgaris* and *S. europaea* (Barkla et al., 1995; Su et al., 2003). The  
438 upregulation of the NHX1 (TRINITY\_DN224256) transcript in shoot tissue was confirmed by qRT-  
439 PCR analysis. This was previously shown in the halophyte *Mesembryanthemum crystallinum* and  
440 NHX1 expression is thought to enhance acclimation to increasing environmental salinity (Barkla et  
441 al., 1995; Su et al., 2003). These studies show that vacuolar Na<sup>+</sup>/H<sup>+</sup> antiporters are important for  
442 increasing plant salt tolerance through Na<sup>+</sup> sequestration (Su et al., 2003).

443 The HKT6 gene is a subfamily member of low-affinity Na<sup>+</sup>/K<sup>+</sup> transporters (Platten et al., 2006). We  
444 identified only one high affinity K<sup>+</sup> transporter transcript that is homologous to the HKT6 gene in *B.*  
445 *vulgaris* and it was highly up-regulated in *S. bigelovii* shoot relative to root tissues. In line with an  
446 observation in *Salicornia dolichostachya*, where the *Arabidopsis thaliana* HKT1 orthologous  
447 transcript was not detectable in root tissue transcriptome data (Katschnig et al., 2015), we are also  
448 unable to detect HKT1 expression in both shoot and root tissue. Low HKT1 transcript expression in  
449 roots has been observed in other species that are members of the Amaranthaceae: *M. crystallinum* (Su  
450 et al., 2003) and *Suaeda salsa* (Shao et al., 2008). These differences in HKT1 expression levels have  
451 been attributed to root tissue Na<sup>+</sup> ‘accumulation strategy’ by these species.

452 The efflux of Na<sup>+</sup> across the plasma membrane is regulated by the SOS1 Na<sup>+</sup>/H<sup>+</sup> antiporter (Shi et al.,  
453 2000). SOS1 mediates Na<sup>+</sup> efflux to the apoplast against the electrochemical potential via secondary  
454 active transport (Ji et al., 2013). Researchers have suggested that *SsSOS1* may mediate Na<sup>+</sup> efflux in  
455 leaves and roots but reduce Na<sup>+</sup> through long distance transfer regulation in stems minimizing Na<sup>+</sup>  
456 toxicity and maintaining homeostasis during salt stress (Song and Wang, 2015). In the halophyte *S.*  
457 *salsa*, the expression of the *SsSOS1* in roots, stems and leaves is induced by salt stress (Wang et al.,

458 2013). In *T. halophila*, there was a sevenfold increase of *ThSOS1* transcript expression levels in root  
459 relative to shoot tissues (Katschnig et al., 2015). Interestingly, in our current study, expression of the  
460 *SbSOS1* is up-regulated in shoots rather than in root tissue. In *S. dolichostachya* shoot tissue, high  
461 expression of *SdSOS1* shows complete suppression of *SdHKT1* (Katschnig et al., 2015).

462 In conclusion, in *S. bigelovii* the *SbSOS1*, *SbNHX*, and *SbHKT6* genes are up-regulated in shoots,  
463 while aquaporins are up regulated in roots. These data present one more instance in which the  
464 regulation of salt stress transcripts differs in *S. bigelovii* relative to what was observed in other  
465 halophyte plant species tissues. Together with the previous observations, our findings suggest that *S.*  
466 *bigelovii* is a salt accumulating species, but the salt accumulation in its shoots occurs through an  
467 unknown mechanism (Salazar, 2017; Furtado et al., 2019).

## 468 **Compatible solutes and osmolyte production**

469 Plants generally compartmentalize Na<sup>+</sup> into vacuoles in order to avoid Na<sup>+</sup> toxicity. To combat the  
470 osmotic stress caused by higher concentrations of Na<sup>+</sup> in the vacuoles, plants accumulate organic  
471 compatible solutes and osmolytes, such as betaine and proline, in their cytoplasm (Parida and Das,  
472 2005; Munns and Tester, 2008).

473 We identified the  $\Delta$ -pyrroline-5-carboxylate synthetase (P5CS, TRINITY\_DN223373) transcript  
474 which has been shown to be involved in proline biosynthesis in plants. The synthesis and transport of  
475 these amino acids promote salt tolerance in most plants (Hasegawa et al., 2000; Munns, 2002;  
476 Flowers and Colmer, 2008; Munns and Tester, 2008). In the euhalophyte, *S. salsa*, P5CS was  
477 upregulated by salinity in different tissues (Wang et al., 2002). The proline-rich protein (*PRP*)  
478 homologue gene in *B. vulgaris* was also expressed in *S. bigelovii* shoot and root tissues. It is highly  
479 up-regulated in the *S. bigelovii* shoot tissue and down-regulated in root tissue. These findings suggest  
480 that the halophyte *S. bigelovii* synthesizes and transports various amino acids to maintain cell turgor  
481 pressure under osmotic stress.

482 Betaine aldehyde dehydrogenase (BADH) is a key enzyme for glycine betaine synthesis, which plays  
483 an important role in improving plant tolerance to salinity (Fitzgerald et al., 2009). We have identified  
484 two BADH transcripts, one upregulated in shoots (TRINITY\_DN213512) and the other in roots  
485 (TRINITY\_DN231325). Further analyses are needed to measure the levels of these osmolytes and  
486 amino acids to confirm their cellular concentration.

487 The regulation of osmolytes and metabolites production is also maintained by TFs. They play a  
488 significant role in plant development, reproduction, intercellular signaling, and cell cycle (Singh et  
489 al., 2002). The WRKY and MYB TFs are unique to plants (Riechmann et al., 2000). Several studies  
490 link specific members of WRKY and MYB TF families to plant stress responses (Rushton et al.,  
491 2010; Li et al., 2019; Tang et al., 2019). We identified transcripts coding for 2 WRKYTFs; WRKY65  
492 and WRKY75. These are present in *B. vulgaris* and are up-regulated in *S. bigelovii* shoots. This TF  
493 family has also been associated with plant stress responses to anaerobic stress and regulation of  
494 secondary metabolite during stress conditions induced by the presence of pathogens (Phukan et al.,  
495 2016). In *Arabidopsis*, WRKY75 initiates stress response by regulating nuclear encoded organelle  
496 proteins (Van Aken et al., 2013). Several TF MYB proteins, such as the MYB44  
497 (TRINITY\_DN219454) and MYB28 (TRINITY\_DN190623) are up-regulated in *S. bigelovii* roots.  
498 Overexpression of *SbMYB44* enhanced the growth of yeast cells under both ionic and osmotic  
499 stresses (Shukla et al., 2015). Overall, salt tolerance in halophytes is a convoluted network that  
500 requires highly regulated and coordinated responses of genes and metabolites.

501 *S. bigelovii* is a valuable halophyte plant adapted to growth in coastal deserts with potential use as a  
502 food crop. Even though studies show the beneficial nutritional and health properties of *Salicornia*  
503 species for use as food and fodder, we lack information regarding its genetic makeup, metabolic  
504 potential, and salt tolerance mechanisms. Understanding salt tolerance in plants at the whole plant,  
505 organelle, and molecular level can point to the selection of salt tolerant food crop genotypes that have  
506 increased crop productivity and quality.

507 We used RNA sequencing data to *de novo* assemble the global transcriptome for *S. bigelovii* grown  
508 under Abu Dhabi's desert environmental conditions. Transcriptomic data from four tissues were  
509 analyzed with a special emphasis on identifying tissue-specific expression patterns previously  
510 implicated in salt stress response. The transcriptome results were validated by gene expression  
511 analysis using qRT-PCR. The identification of *S. bigelovii* specific transcripts can be exploited for  
512 elucidating metabolic systems, osmotic stress related secondary metabolite production, and oil  
513 biosynthesis in *S. bigelovii*.

514 It comes as no surprise that the tissue specific expression levels of genes between *S. bigelovii* and  
515 other plants vary and are dependent on the cellular function in response to abiotic stress. These data  
516 also suggest that TFs are a key member of these events as our data suggest they are involved in  
517 regulation key cellular metabolic processes in plants. To summarize, the results of this study provide  
518 the first transcriptome sequencing of the strict halophyte, *S. bigelovii*.

#### 519 **Data Availability Statement**

520 All RNA sequencing data have been deposited at the NCBI in the Short Read Archive database  
521 (Bioproject ID: PRJNA607385, Biosample ID: SUB6825665) and is available under request.

#### 522 **Author Contributions**

523 HC designed the study, performed all field experiments, collection and preparation of tissue samples,  
524 RNA isolation, qPCR-based expression analysis for transcriptomics study, performed RNA-Seq  
525 validations, measurement of gene expression from qPCR, and wrote and revised the manuscript. MV  
526 performed the bioinformatics analyses including genome assembly, annotation, and RNA-Seq  
527 analysis. MD prepared RNA-Seq libraries and performed high throughput sequencing. YI provided  
528 critical inputs for RNA-Seq data analysis and presentation. AH critically reviewed the manuscript.  
529 HHH and revised, reviewed, submitted the manuscript, and provided the resources All authors have  
530 read and approved the final manuscript.

#### 531 **Funding**

532 This work was funded by a grant from the Sustainable Bioenergy Research Consortium award  
533 number EX2016-000023 and the New York University Abu Dhabi research grant AD105.

#### 534 **Conflict of Interest**

535 The authors declare that the research was conducted in the absence of any commercial or financial  
536 relationships that could be construed as a potential conflict of interest.

#### 537 **Acknowledgments**

538 We would like to thank all the people at the Seawater Energy and Agriculture System pilot facility  
539 for their help in sample collection and Dr. Runyararo M. Nyadzayo for all her constructive comments  
540 and edits to the manuscript.

#### 541 **Supplementary Material**

542 The Supplementary Material for this article can be found online.

#### 543 **References**

- 544 Ahmad, R., Jamil, S., Shahzad, M., Zörb, C., Irshad, U., Khan, N., et al. (2017). Metabolic Profiling  
545 to Elucidate Genetic Elements Due to Salt Stress. *CLEAN – Soil, Air, Water* 45(12), 1600574.  
546 doi: 10.1002/clen.201600574.
- 547 Andrews, S. (2010). "FASTQC. A quality control tool for high throughput sequence data".).
- 548 Anwar, F., Bhangar, M.I., Nasir, M.K., and Ismail, S. (2002). Analytical characterization of  
549 *Salicornia bigelovii* seed oil cultivated in Pakistan. *J Agric Food Chem* 50(15), 4210-4214.  
550 doi: 10.1021/jf0114132.
- 551 Ashburner, M., Ball, C.A., Blake, J.A., Botstein, D., Butler, H., Cherry, J.M., et al. (2000). Gene  
552 Ontology: tool for the unification of biology. *Nature Genetics* 25(1), 25-29. doi:  
553 10.1038/75556.
- 554 Atkinson, N.J., and Urwin, P.E. (2012). The interaction of plant biotic and abiotic stresses: from  
555 genes to the field. *Journal of experimental botany* 63(10), 3523-3543.
- 556 Ayala, F., O'Leary, J.W., and Schumaker, K.S. (1996). Increased vacuolar and plasma membrane H<sup>+</sup>-  
557 ATPase activities in *Salicornia bigelovii* Torr. in response to NaCl. *Journal of Experimental*  
558 *Botany* 47(1), 25-32. doi: 10.1093/jxb/47.1.25.
- 559 Barkla, B.J., Zingarelli, L., Blumwald, E., and Smith, J. (1995). Tonoplast Na<sup>+</sup>/H<sup>+</sup> antiport activity  
560 and its energization by the vacuolar H<sup>+</sup>-ATPase in the halophytic plant *Mesembryanthemum*  
561 *crystallinum* L. *Plant Physiol* 109(2), 549-556. doi: 10.1104/pp.109.2.549.
- 562 Berger, B., Parent, B., and Tester, M. (2010). High-throughput shoot imaging to study drought  
563 responses. *J Exp Bot* 61(13), 3519-3528. doi: 10.1093/jxb/erq201.
- 564 Bolger, A.M., Lohse, M., and Usadel, B. (2014). Trimmomatic: a flexible trimmer for Illumina  
565 sequence data. *Bioinformatics* 30(15), 2114-2120. doi: 10.1093/bioinformatics/btu170.
- 566 Boyer, J.S. (1982). Plant productivity and environment. *Science* 218(4571), 443-448. doi:  
567 10.1126/science.218.4571.443.
- 568 Bray, R.A., Bailey-Serres, J., and Weretilnyk, E. (2000). "Response to abiotic stress," in  
569 *Biochemistry and molecular biology of plants*, eds. B.B. B., G. W. & J.R. L. (New York, NY  
570 USA: American Society of Plant Physiologists), 1158-1203.
- 571 Consortium, T.U. (2018). UniProt: a worldwide hub of protein knowledge. *Nucleic Acids Research*  
572 47(D1), D506-D515. doi: 10.1093/nar/gky1049.
- 573 Deinlein, U., Stephan, A.B., Horie, T., Luo, W., Xu, G., and Schroeder, J.I. (2014). Plant salt-  
574 tolerance mechanisms. *Trends in plant science* 19(6), 371-379. doi:  
575 10.1016/j.tplants.2014.02.001.
- 576 El-Mallah, M.H., Turui, T., and El-Shami, S. (1994). Detailed studies on seed oil of *Salicornia* SOS-  
577 7 cultivated at the Egyptian border of Red Sea. *Grasas Y Aceites*.

- 578 Fan, P., Nie, L., Jiang, P., Feng, J., Lv, S., Chen, X., et al. (2013). Transcriptome analysis of  
579 *Salicornia europaea* under saline conditions revealed the adaptive primary metabolic  
580 pathways as early events to facilitate salt adaptation. *PLoS One* 8(11).
- 581 Fitzgerald, T.L., Waters, D.L., and Henry, R.J. (2009). Betaine aldehyde dehydrogenase in plants.  
582 *Plant biology* 11(2), 119-130.
- 583 Flowers, T.J., and Colmer, T.D. (2008). Salinity tolerance in halophytes. *New Phytologist*, 945-963.
- 584 Flowers, T.J., Galal, H.K., and Bromham, L. (2010). Evolution of halophytes: multiple origins of salt  
585 tolerance in land plants. *Functional Plant Biology* 37(7), 604-612.
- 586 Flowers, T.J., Munns, R., and Colmer, T.D. (2015). Sodium chloride toxicity and the cellular basis of  
587 salt tolerance in halophytes. *Annals of botany* 115(3), 419-431.
- 588 Furtado, B.U., Nagy, I., Asp, T., Tyburski, J., Skorupa, M., Gołębiewski, M., et al. (2019).  
589 Transcriptome profiling and environmental linkage to salinity across *Salicornia europaea*  
590 vegetation. *BMC plant biology* 19(1), 427.
- 591 Gaxiola, R.A., Palmgren, M.G., and Schumacher, K. (2007). Plant proton pumps. *FEBS letters*  
592 581(12), 2204-2214.
- 593 Ghosh, P., Westhoff, P., and Debnath, D. (2019). "Biofuels, food security, and sustainability," in  
594 *Biofuels, Bioenergy and Food Security*, eds. D. Debnath & S.C. Babu. Academic Press), 211-  
595 229.
- 596 Gill, S.S., and Tuteja, N. (2010). Reactive oxygen species and antioxidant machinery in abiotic stress  
597 tolerance in crop plants. *Plant physiology and biochemistry* 48(12), 909-930.
- 598 Glenn, E., Miyamoto, S., Moore, D., Brown, J.J., Thompson, T.L., and Brown, P. (1997). Water  
599 requirements for cultivating *Salicornia bigelovii* Torr. with seawater on sand in a coastal  
600 desert environment. *Journal of Arid Environments* 36(4), 711-730.
- 601 Glenn, E.P., Anday, T., Chaturvedi, R., Martinez-Garcia, R., Pearlstein, S., Soliz, D., et al. (2013).  
602 Three halophytes for saline-water agriculture: An oilseed, a forage and a grain crop.  
603 *Environmental and Experimental Botany* 92, 110-121.
- 604 Glenn, E.P., Brown, J.J., and Blumwald, E. (1999). Salt tolerance and crop potential of halophytes.  
605 *Critical reviews in plant sciences* 18(2), 227-255.
- 606 Glenn, E.P., Coates, W.E., Riley, J.J., Kuehl, R.O., and Swingle, R.S. (1992). *Salicornia bigelovii*  
607 Torr.: a seawater-irrigated forage for goats. *Animal Feed Science and Technology* 40(1), 21-  
608 30.
- 609 Glenn, E.P., Jed Brown, J., and O'Leary, J.W. (1998). Irrigating crops with seawater. *SCIENTIFIC*  
610 *AMERICAN-AMERICAN EDITION*- 279, 76-81.
- 611 Gomes-Filho, E., Lima, C.R.F.M., Costa, J.H., da Silva, A.C.M., da Guia Silva Lima, M., de  
612 Lacerda, C.F., et al. (2008). Cowpea ribonuclease: properties and effect of NaCl-salinity on  
613 its activation during seed germination and seedling establishment. *Plant Cell Reports* 27(1),  
614 147-157. doi: 10.1007/s00299-007-0433-5.
- 615 Götz, S., García-Gómez, J.M., Terol, J., Williams, T.D., Nagaraj, S.H., Nueda, M.J., et al. (2008).  
616 High-throughput functional annotation and data mining with the Blast2GO suite. *Nucleic*  
617 *acids research* 36(10), 3420-3435.

- 618 Grabherr, M.G., Haas, B.J., Yassour, M., Levin, J.Z., Thompson, D.A., Amit, I., et al. (2011). Full-  
619 length transcriptome assembly from RNA-Seq data without a reference genome. *Nature*  
620 *biotechnology* 29(7), 644.
- 621 Hao, X., Horvath, D.P., Chao, W.S., Yang, Y., Wang, X., and Xiao, B. (2014). Identification and  
622 evaluation of reliable reference genes for quantitative real-time PCR analysis in tea plant  
623 (*Camellia sinensis* (L.) O. Kuntze). *International journal of molecular sciences* 15(12),  
624 22155-22172. doi: 10.3390/ijms151222155.
- 625 Hasegawa, P.M., Bressan, R.A., Zhu, J.-K., and Bohnert, H.J. (2000). Plant cellular and molecular  
626 responses to high salinity. *Annual review of plant biology* 51(1), 463-499.
- 627 Huerta-Cepas, J., Szklarczyk, D., Forslund, K., Cook, H., Heller, D., Walter, M.C., et al. (2016).  
628 eggNOG 4.5: a hierarchical orthology framework with improved functional annotations for  
629 eukaryotic, prokaryotic and viral sequences. *Nucleic acids research* 44(D1), D286-D293.
- 630 Jenks, M.A., Hasegawa, P.M., and Jain, S.M. (2007). *Advances in molecular breeding toward*  
631 *drought and salt tolerant crops*. Springer.
- 632 Ji, H., Pardo, J.M., Batelli, G., Van Oosten, M.J., Bressan, R.A., and Li, X. (2013). The Salt Overly  
633 Sensitive (SOS) pathway: established and emerging roles. *Molecular plant* 6(2), 275-286.
- 634 Kadereit, G., Ball, P., Beer, S., Mucina, L., Sokoloff, D., Teege, P., et al. (2007). A taxonomic  
635 nightmare comes true: phylogeny and biogeography of glassworts (*Salicornia* L.,  
636 *Chenopodiaceae*). *Taxon* 56(4), 1143-1170.
- 637 Kadereit, G., Mucina, L., and Freitag, H. (2006). Phylogeny of *Salicornioideae* (*Chenopodiaceae*):  
638 diversification, biogeography, and evolutionary trends in leaf and flower morphology. *Taxon*  
639 55(3), 617-642.
- 640 Kanehisa, M., and Goto, S. (2000). KEGG: Kyoto Encyclopedia of Genes and Genomes. *Nucleic*  
641 *Acids Research* 28(1), 27-30. doi: 10.1093/nar/28.1.27.
- 642 Katschnig, D., Blied, T., Rozema, J., and Schat, H. (2015). Constitutive high-level SOS1 expression  
643 and absence of HKT1; 1 expression in the salt-accumulating halophyte *Salicornia*  
644 *dolichostachya*. *Plant Science* 234, 144-154.
- 645 Khan, M.A., Ungar, I.A., and Showalter, A.M. (2000). The effect of salinity on the growth, water  
646 status, and ion content of a leaf succulent perennial halophyte, *Suaeda fruticosa* (L.) Forssk.  
647 *Journal of Arid Environments* 45(1), 73-84.
- 648 Kline, K.L., Msangi, S., Dale, V.H., Woods, J., Souza, G.M., Osseweijer, P., et al. (2017).  
649 Reconciling food security and bioenergy: priorities for action. *Gcb Bioenergy* 9(3), 557-576.
- 650 Li, X., Guo, C., Ahmad, S., Wang, Q., Yu, J., Liu, C., et al. (2019). Systematic Analysis of MYB  
651 Family Genes in Potato and Their Multiple Roles in Development and Stress Responses.  
652 *Biomolecules* 9(8), 317.
- 653 Livak, K.J., and Schmittgen, T.D. (2001). Analysis of relative gene expression data using Real-Time  
654 Quantitative PCR and the  $2^{-\Delta\Delta CT}$  method. *Methods* 25(4), 402-408. doi:  
655 <https://doi.org/10.1006/meth.2001.1262>.
- 656 Loqué, D., Ludewig, U., Yuan, L., and von Wirén, N. (2005). Tonoplast intrinsic proteins *AtTIP2; 1*  
657 and *AtTIP2; 3* facilitate  $\text{NH}_3$  transport into the vacuole. *Plant physiology* 137(2), 671-680.



- 658 Madeira, F., Park, Y.m., Lee, J., Buso, N., Gur, T., Madhusoodanan, N., et al. (2019). The EMBL-  
659 EBI search and sequence analysis tools APIs in 2019. *Nucleic Acids Research* 47(W1),  
660 W636-W641. doi: 10.1093/nar/gkz268.
- 661 Maurel, C., Boursiac, Y., Luu, D.-T., Santoni, V., Shahzad, Z., and Verdoucq, L. (2015). Aquaporins  
662 in plants. *Physiological reviews* 95(4), 1321-1358.
- 663 Mittler, R. (2006). Abiotic stress, the field environment and stress combination. *Trends in plant*  
664 *science* 11(1), 15-19.
- 665 Munns, R. (2002). Comparative physiology of salt and water stress. *Plant, cell & environment* 25(2),  
666 239-250.
- 667 Munns, R., and Tester, M. (2008). Mechanisms of salinity tolerance. *Annu. Rev. Plant Biol.* 59, 651-  
668 681.
- 669 Negrão, S., Schmöckel, S.M., and Tester, M. (2016). Evaluating physiological responses of plants to  
670 salinity stress. *Annals of Botany* 119(1), 1-11. doi: 10.1093/aob/mcw191.
- 671 Oh, D.-H., Hong, H., Lee, S.Y., Yun, D.-J., Bohnert, H.J., and Dassanayake, M. (2014). Genome  
672 structures and transcriptomes signify niche adaptation for the multiple-ion-tolerant  
673 extremophyte *Schrenkiella parvula*. *Plant Physiology* 164(4), 2123-2138.
- 674 Oh, M.-M., Carey, E.E., and Rajashekar, C. (2009). Environmental stresses induce health-promoting  
675 phytochemicals in lettuce. *Plant Physiology and Biochemistry* 47(7), 578-583.
- 676 Osakabe, Y., Osakabe, K., Shinozaki, K., and Tran, L.-S.P. (2014). Response of plants to water  
677 stress. *Frontiers in plant science* 5, 86-86. doi: 10.3389/fpls.2014.00086.
- 678 Pandey, P., Irulappan, V., Bagavathiannan, M.V., and Senthil-Kumar, M. (2017). Impact of  
679 combined abiotic and biotic stresses on plant growth and avenues for crop improvement by  
680 exploiting physio-morphological traits. *Frontiers in Plant Science* 8(537). doi:  
681 10.3389/fpls.2017.00537.
- 682 Panta, S., Flowers, T., Lane, P., Doyle, R., Haros, G., and Shabala, S. (2014). Halophyte agriculture:  
683 success stories. *Environmental and Experimental Botany* 107, 71-83.
- 684 Parida, A.K., and Das, A.B. (2005). Salt tolerance and salinity effects on plants: a review.  
685 *Ecotoxicology and environmental safety* 60(3), 324-349.
- 686 Phukan, U.J., Jeena, G.S., and Shukla, R.K. (2016). WRKY transcription factors: molecular  
687 regulation and stress responses in plants. *Frontiers in plant science* 7, 760.
- 688 Platten, J.D., Cotsaftis, O., Berthomieu, P., Bohnert, H., Davenport, R.J., Fairbairn, D.J., et al.  
689 (2006). Nomenclature for HKT transporters, key determinants of plant salinity tolerance.  
690 *Trends in plant science* 11(8), 372-374.
- 691 Pucker, B., and Schilbert, H.M. (2019). "Genomics and Transcriptomics Advance in Plant Sciences,"  
692 in *Molecular Approaches in Plant Biology and Environmental Challenges*, eds. S.P. Singh,  
693 S.K. Upadhyay, A. Pandey & S. Kumar. (Singapore: Springer Singapore), 419-448.
- 694 Qadir, M., Quillérou, E., Nangia, V., Murtaza, G., Singh, M., Thomas, R.J., et al. (Year). "Economics  
695 of salt-induced land degradation and restoration", in: *Natural resources forum*: Wiley Online  
696 Library), 282-295.
- 697 Ramegowda, V., and Senthil-Kumar, M. (2015). The interactive effects of simultaneous biotic and  
698 abiotic stresses on plants: Mechanistic understanding from drought and pathogen

- 699 combination. *Journal of Plant Physiology* 176, 47-54. doi:  
700 <https://doi.org/10.1016/j.jplph.2014.11.008>.
- 701 Ray, D.K., Mueller, N.D., West, P.C., and Foley, J.A. (2013). Yield trends are insufficient to double  
702 global crop production by 2050. *PLoS one* 8(6), e66428.
- 703 Riechmann, J.L., Heard, J., Martin, G., Reuber, L., Jiang, C.-Z., Keddie, J., et al. (2000). *Arabidopsis*  
704 transcription factors: genome-wide comparative analysis among eukaryotes. *Science*  
705 290(5499), 2105-2110.
- 706 Rivero, R.M., Mestre, T.C., Mittler, R., Rubio, F., Garcia-Sanchez, F., and Martinez, V. (2014). The  
707 combined effect of salinity and heat reveals a specific physiological, biochemical and  
708 molecular response in tomato plants. *Plant, Cell & Environment* 37(5), 1059-1073. doi:  
709 10.1111/pce.12199.
- 710 Roy, S.J., Negrão, S., and Tester, M. (2014). Salt resistant crop plants. *Current opinion in*  
711 *Biotechnology* 26, 115-124.
- 712 Rozema, J., and Schat, H. (2013). Salt tolerance of halophytes, research questions reviewed in the  
713 perspective of saline agriculture. *Environmental and Experimental Botany* 92, 83-95.
- 714 Rushton, P.J., Somssich, I.E., Ringler, P., and Shen, Q.J. (2010). WRKY transcription factors. *Trends*  
715 *in plant science* 15(5), 247-258.
- 716 Salazar, O. (2017). *Identification of proteins involved in salinity tolerance in Salicornia bigelovii*.  
717 PhD, King Abdullah University of Science and Technology.
- 718 Shao, Q., Zhao, C., Han, N., and Wang, B.-S. (2008). Cloning and expression pattern of SsHKT1  
719 encoding a putative cation transporter from halophyte *Suaeda salsa*. *DNA Sequence* 19(2),  
720 106-114.
- 721 Shi, H., Ishitani, M., Kim, C., and Zhu, J.-K. (2000). The *Arabidopsis thaliana* salt tolerance gene  
722 SOS1 encodes a putative Na<sup>+</sup>/H<sup>+</sup> antiporter. *Proceedings of the national academy of sciences*  
723 97(12), 6896-6901.
- 724 Shukla, P.S., Agarwal, P., Gupta, K., and Agarwal, P.K. (2015). Molecular characterization of an  
725 MYB transcription factor from a succulent halophyte involved in stress tolerance. *AoB plants*  
726 7.
- 727 Silva, P., and Gerós, H. (2009). Regulation by salt of vacuolar H<sup>+</sup>-ATPase and H<sup>+</sup>-pyrophosphatase  
728 activities and Na<sup>+</sup>/H<sup>+</sup> exchange. *Plant Signaling & Behavior* 4(8), 718-726. doi:  
729 10.4161/psb.4.8.9236.
- 730 Singh, K.B., Foley, R.C., and Oñate-Sánchez, L. (2002). Transcription factors in plant defense and  
731 stress responses. *Current opinion in plant biology* 5(5), 430-436.
- 732 Singh, L.P., Gill, S.S., and Tuteja, N. (2011). Unraveling the role of fungal symbionts in plant abiotic  
733 stress tolerance. *Plant signaling & behavior* 6(2), 175-191.
- 734 Song, J., and Wang, B. (2015). Using euhalophytes to understand salt tolerance and to develop saline  
735 agriculture: *Suaeda salsa* as a promising model. *Annals of Botany* 115(3), 541-553.
- 736 Statistics Center (2018). "Statistical Yearbook of Abu Dhabi 2017". Statistics Centre of Abu Dhabi).
- 737 Su, H., Balderas, E., Vera-Estrella, R., Gollack, D., Quigley, F., Zhao, C., et al. (2003). Expression  
738 of the cation transporter MchKT1 in a halophyte. *Plant Molecular Biology* 52(5), 967-980.

- 739 Tang, Y., Bao, X., Zhi, Y., Wu, Q., Yin, X., Zeng, L., et al. (2019). Overexpression of a MYB family  
740 gene, OsMYB6, increases drought and salinity stress tolerance in transgenic rice. *Frontiers in*  
741 *plant science* 10, 168.
- 742 The Gene Ontology Consortium (2018). The Gene Ontology Resource: 20 years and still GOing  
743 strong. *Nucleic Acids Research* 47(D1), D330-D338. doi: 10.1093/nar/gky1055.
- 744 UN (2019). "World population prospects 2019". United Nations).
- 745 Vaishnav, A., Shukla, A.K., Sharma, A., Kumar, R., and Choudhary, D.K. (2019). Endophytic  
746 bacteria in plant salt stress tolerance: Current and future prospects. *Journal of Plant Growth*  
747 *Regulation* 38(2), 650-668. doi: 10.1007/s00344-018-9880-1.
- 748 Van Aken, O., Zhang, B., Law, S., Narsai, R., and Whelan, J. (2013). AtWRKY40 and AtWRKY63  
749 modulate the expression of stress-responsive nuclear genes encoding mitochondrial and  
750 chloroplast proteins. *Plant physiology* 162(1), 254-271.
- 751 Wang, G.-L., Tian, C., Jiang, Q., Xu, Z.-S., Wang, F., and Xiong, A.-S. (2016). Comparison of nine  
752 reference genes for real-time quantitative PCR in roots and leaves during five developmental  
753 stages in carrot (*Daucus carota* L.). *The Journal of Horticultural Science and Biotechnology*  
754 91(3), 264-270. doi: 10.1080/14620316.2016.1148372.
- 755 Wang, S.-P., Krits, I., Bai, S., and Lee, B.S. (2002). Regulation of enhanced vacuolar H<sup>+</sup>-ATPase  
756 expression in macrophages. *Journal of Biological Chemistry* 277(11), 8827-8834.
- 757 Wang, S., DUan, L.W., JL, Z., and SM, W. (2013). "Molecular cloning and sequence analysis of  
758 plasma membrane Na<sup>+</sup>/H<sup>+</sup> antiporter gene (SsSOS1) from halophyte *Suaeda salsa*".).
- 759 Warshay, B., Brown, J.J., and Sgouridis, S. (2017). Life cycle assessment of integrated seawater  
760 agriculture in the Arabian (Persian) Gulf as a potential food and aviation biofuel resource. *The*  
761 *International Journal of Life Cycle Assessment* 22(7), 1017-1032.
- 762 Wu, Y., Hu, Y., and Xu, G. (2009). Interactive effects of potassium and sodium on root growth and  
763 expression of K/Na transporter genes in rice. *Plant Growth Regulation* 57(3), 271.
- 764 Yuan, F., Guo, J., Shabala, S., and Wang, B. (2019). Reproductive physiology of halophytes: current  
765 standing. *Frontiers in plant science* 9, 1954.
- 766 Zerai, D.B., Glenn, E.P., Chattervedi, R., Lu, Z., Mamood, A.N., Nelson, S.G., et al. (2010). Potential  
767 for the improvement of *Salicornia bigelovii* through selective breeding. *Ecological*  
768 *Engineering* 36(5), 730-739.
- 769 Zhang, G.-H., Su, Q., An, L.-J., and Wu, S. (2008). Characterization and expression of a vacuolar  
770 Na<sup>+</sup>/H<sup>+</sup> antiporter gene from the monocot halophyte *Aeluropus litoralis*. *Plant Physiology*  
771 *and Biochemistry* 46(2), 117-126.
- 772 Zhao, L., Yang, Z., Guo, Q., Mao, S., Li, S., Sun, F., et al. (2017). Transcriptomic profiling and  
773 physiological responses of halophyte *Kochia sieversiana* provide insights into salt tolerance.  
774 *Frontiers in Plant Science* 8(1985). doi: 10.3389/fpls.2017.01985.
- 775 Zhu, J.-K. (2002). Salt and drought stress signal transduction in plants. *Annual Review of Plant*  
776 *Biology* 53(1), 247-273. doi: 10.1146/annurev.arplant.53.091401.143329.
- 777 Zörb, C., Geilfus, C.M., and Dietz, K.J. (2019). Salinity and crop yield. *Plant biology* 21, 31-38.

778

779 **Table 1.** Sequencing and assembly statistics of *S. bigelovii* transcriptome.

| <b>Organs</b>                      | <b>number of trimmed reads</b> |
|------------------------------------|--------------------------------|
| Flowers                            | 43,459,494                     |
| Shoots                             | 47,133,647                     |
| Roots                              | 48,398,048                     |
| Seeds                              | 51,236,541                     |
| <b>Total reads</b>                 | <b>190,227,730</b>             |
| <b>Total assembled transcripts</b> | <b>643,752</b>                 |
| <b>Percent GC (%)</b>              | <b>45,28</b>                   |
| <b>Smallest (bp)</b>               | <b>200</b>                     |
| <b>Average (bp)</b>                | <b>557</b>                     |
| <b>N50 (bp)</b>                    | <b>722</b>                     |

780

781 **Figure 1.** Functional annotation of *S. bigelovii* transcriptome. (A) Global sequence distribution  
782 transcripts length, (B) *E*-value distribution of BLAST hits for each unique sequence against the N  
783 database, (C) Distribution of Blast2GO three step processes including KEGG, InterPro, and BLAST  
784 hits of total number of assembled transcripts.

785 **Figure 2.** Annotation of the *S. bigelovii* transcriptome. Species distribution of the top 20 plant  
786 species based on BlastX alignments against the NCBI nr database.

787 **Figure 3.** GO-level distributions in *S. bigelovii* transcriptome. (A) P, F and C represent the biological  
788 process (BP), molecular function (MF), and cellular component (CC), respectively. Total  
789 Annotations = 133,971, Mean Level = 6.91, and (B) Classification of *S. bigelovii* transcripts into  
790 functional categories (BP, MF, and CC) according to GO-terms on the basis of GO tool.

791 **Figure 4.** Distribution of protein domains predicted in the *S. bigelovii* transcriptome. Histogram of  
792 the 20 most abundant InterPro domains revealed by the InterProScan (IPS) annotation of assembled  
793 transcripts.

794 **Figure 5.** Global gene expression pattern of *S. bigelovii* transcriptome. Four major clusters of DET  
795 were identified in relation to tissue distribution. Heatmap displays global expression levels of DETs

796 (rows) of all tissues based on FPKM values between all tissues. Columns represent samples (flower  
797 (F1, F2, F3), shoot (S1, S2, S3), root (R1, R2, R3), and seed (G1, G2, G3) tissues) while rows  
798 represent transcripts. For visualization purposes, the expression values were limited to 3 and -3.

799 **Figure 6.** Global DETs comparison between all four tissue libraries. **(A)** Distribution of transcripts  
800 differentially expressed between roots and shoots (red), roots and seeds (green), roots and flowers  
801 (blue). Statistics were performed using the DESeqv1.8 methods with FDR 0.05 and FC=2. **(B)** The  
802 red columns indicate the up-regulated DETs and the green columns represent the down-regulated  
803 DETs in four pair-wise tissue comparisons.

804 **Figure 7.** Heatmap of transcripts implicated in salt stress tolerance based on FPKM units of DETs  
805 between shoots (S1, S2, S3) and roots (R1, R2, R3).

806 **Figure 8.** The expression validation of candidate transcripts implicated in salt stress tolerance in *S.*  
807 *bigelovii* by qRT-PCR. Error bars represent the mean ( $\pm$  SD) of three replicates.

808

bioRxiv preprint doi: <https://doi.org/10.1101/2020.03.17.995720>; this version posted March 20, 2020. The copyright holder for this preprint (which was not certified by peer review) is the author/funder, who has granted bioRxiv a license to display the preprint in perpetuity. It is made available under aCC-BY-NC 4.0 International license.

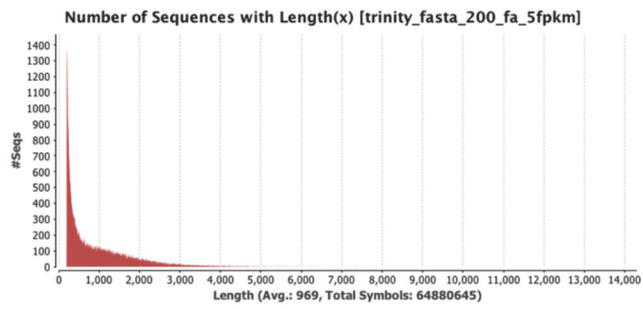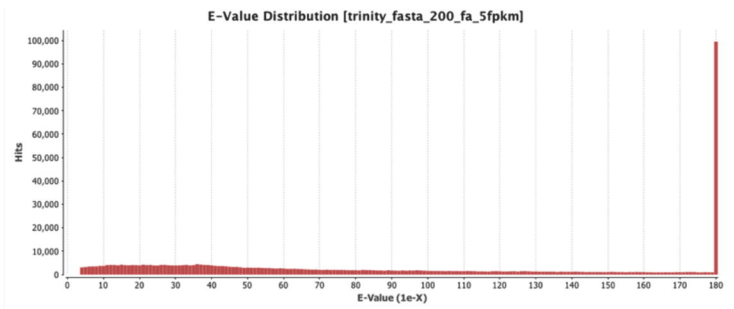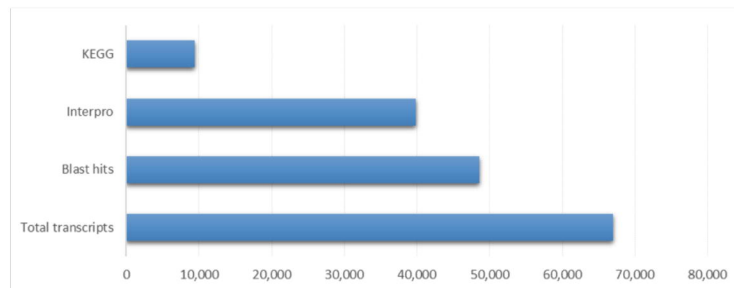

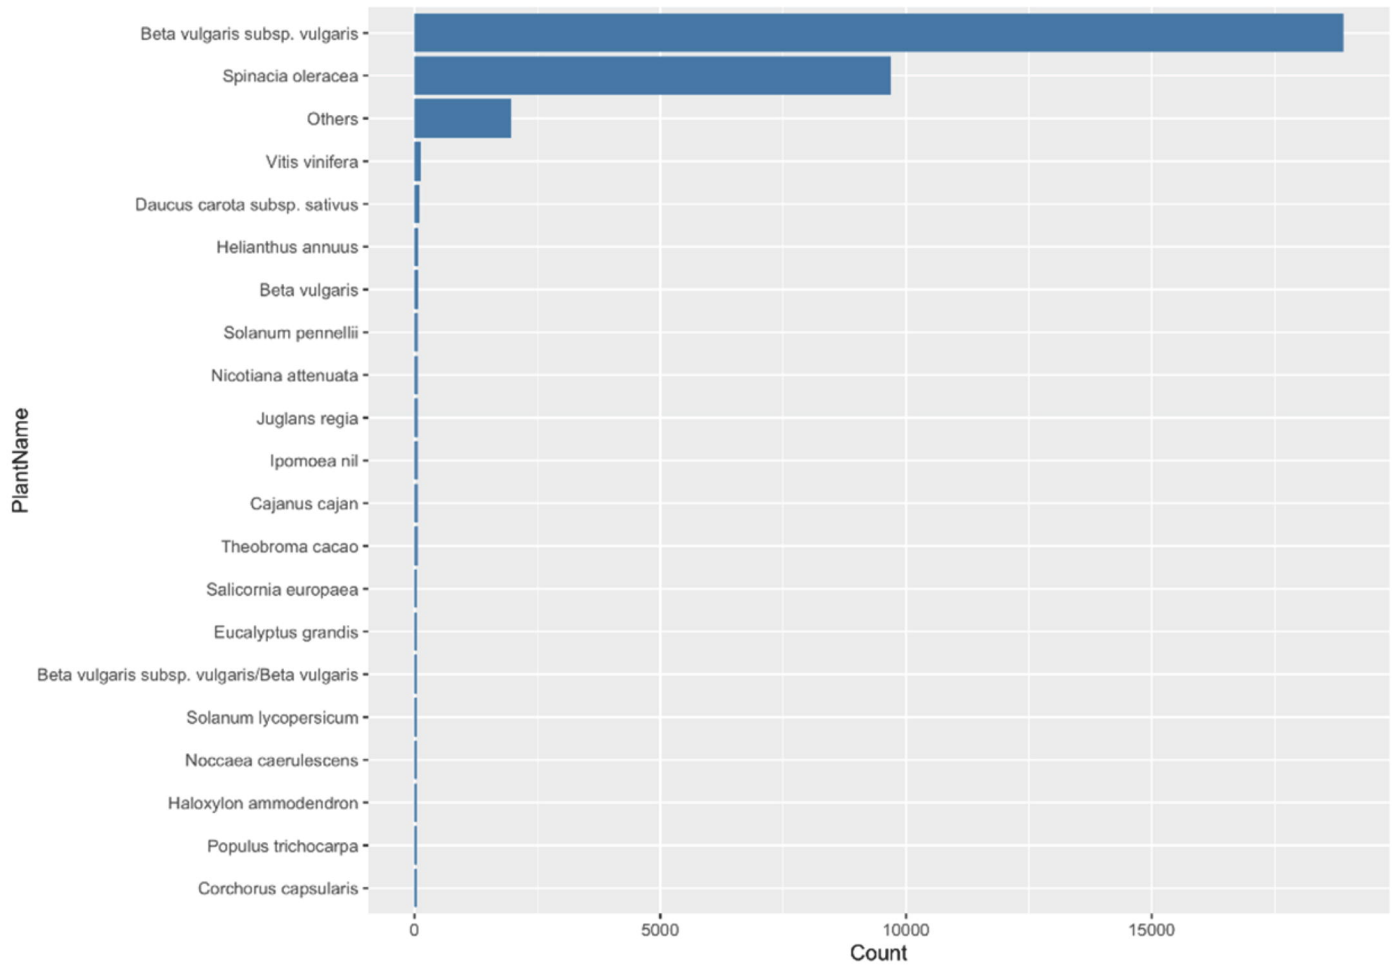

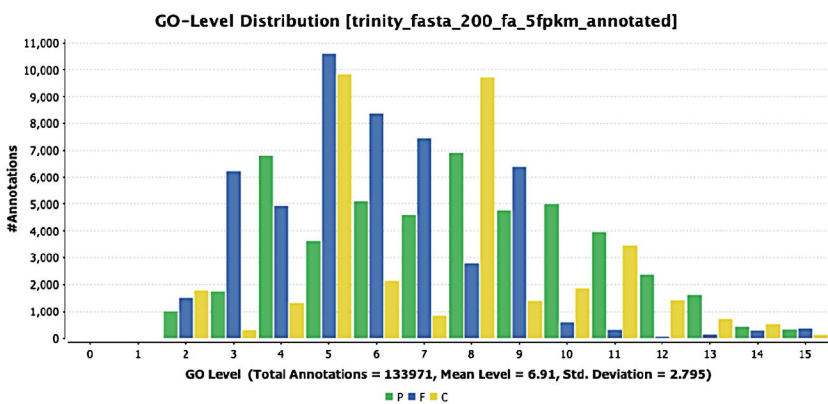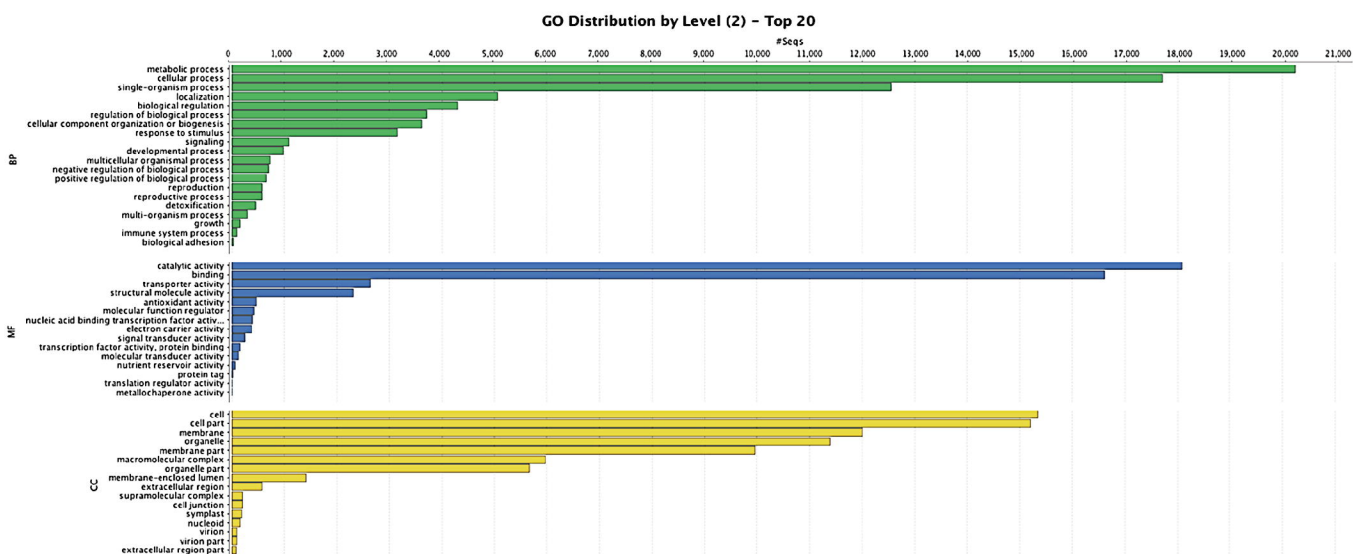



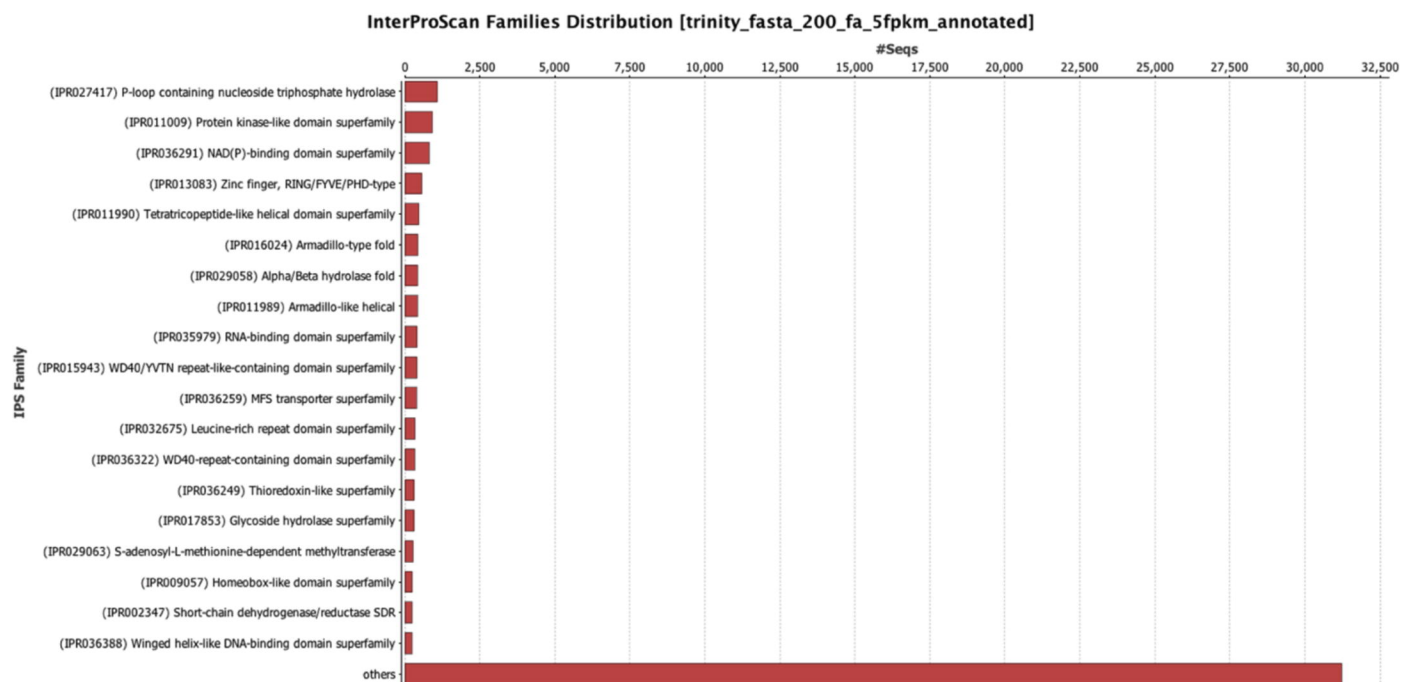

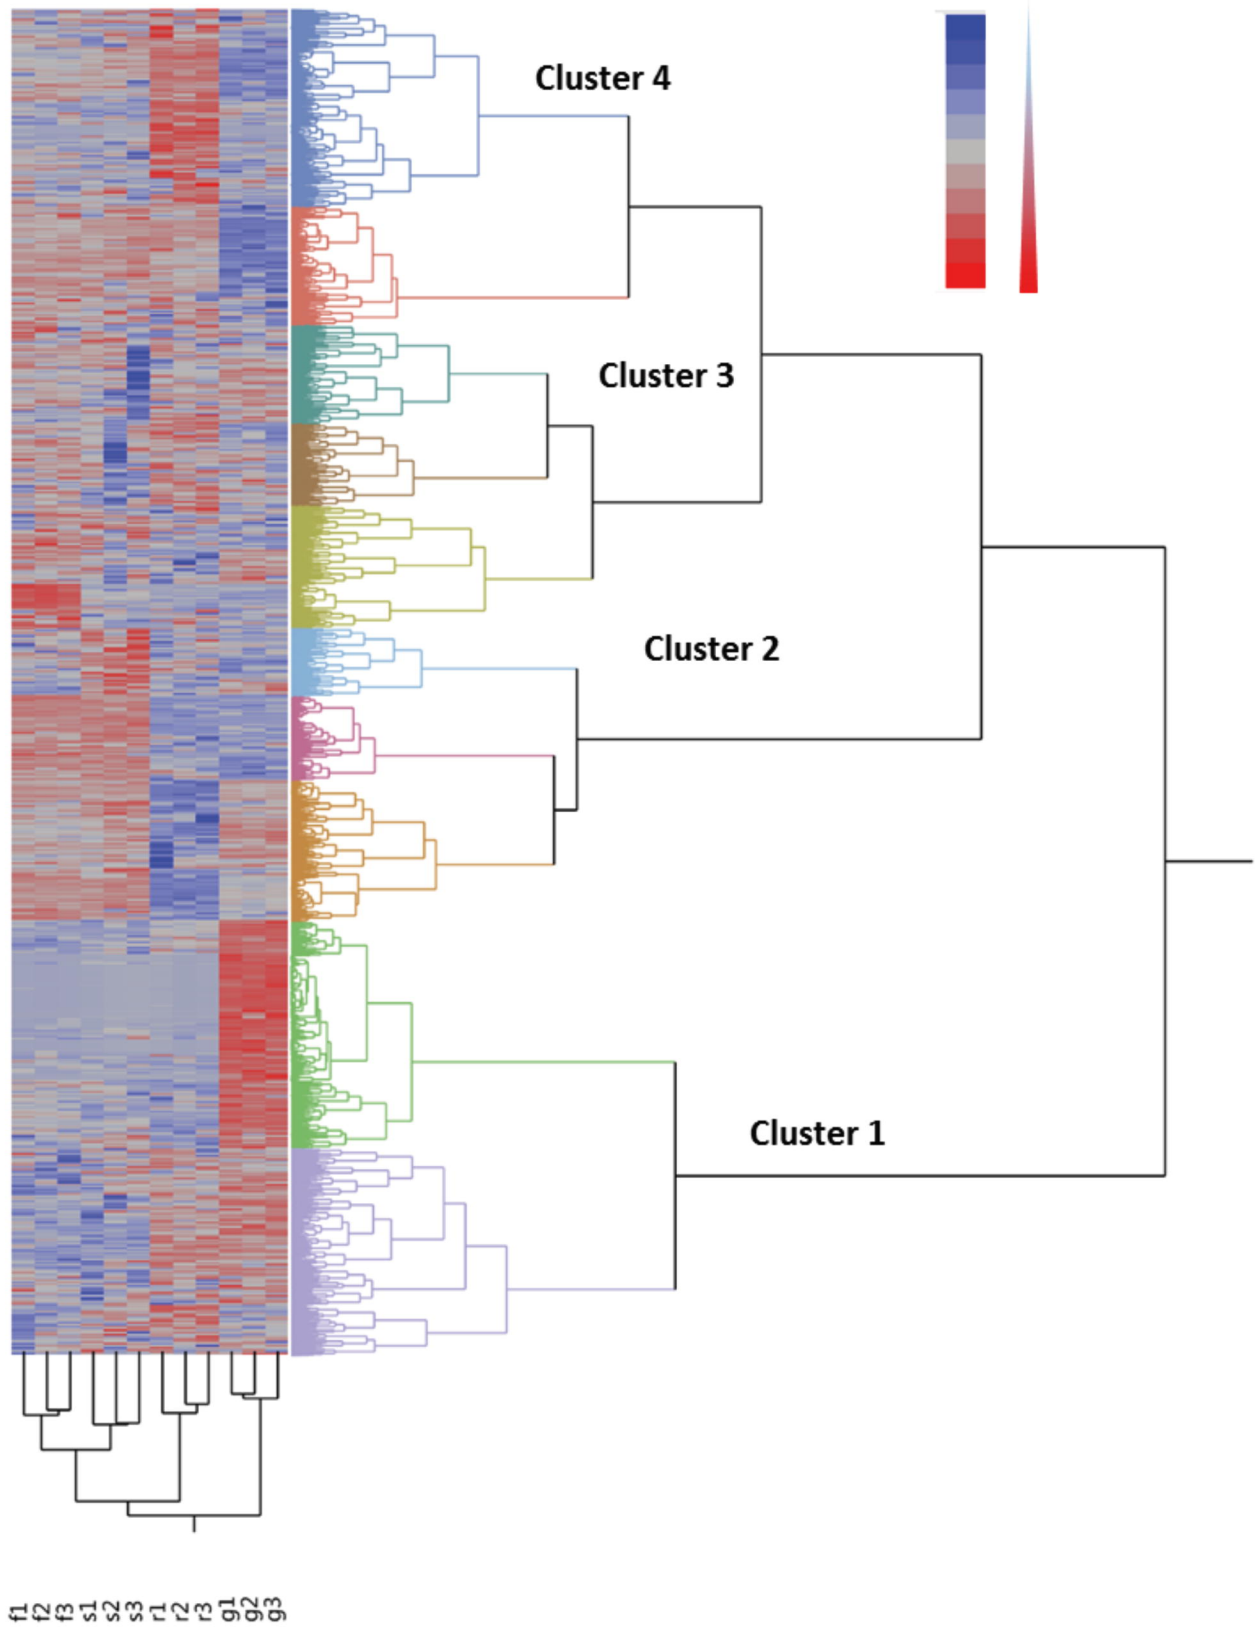

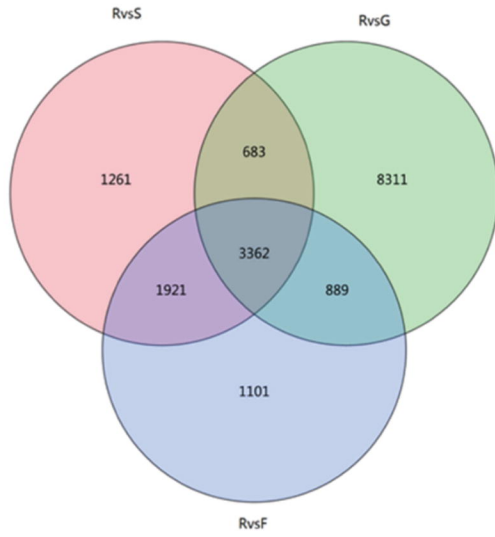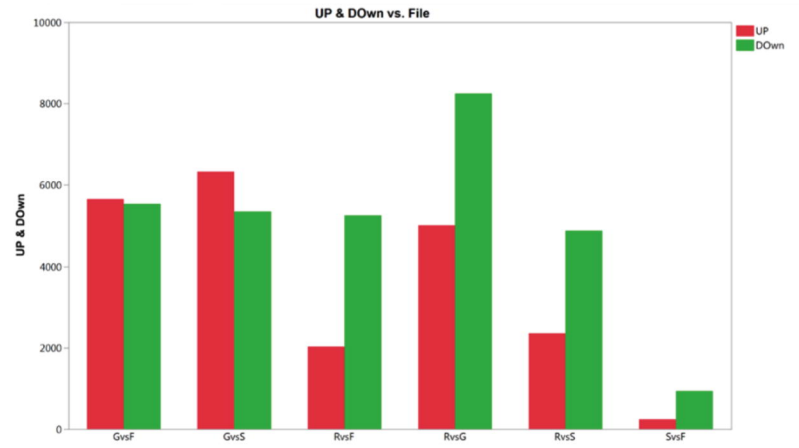

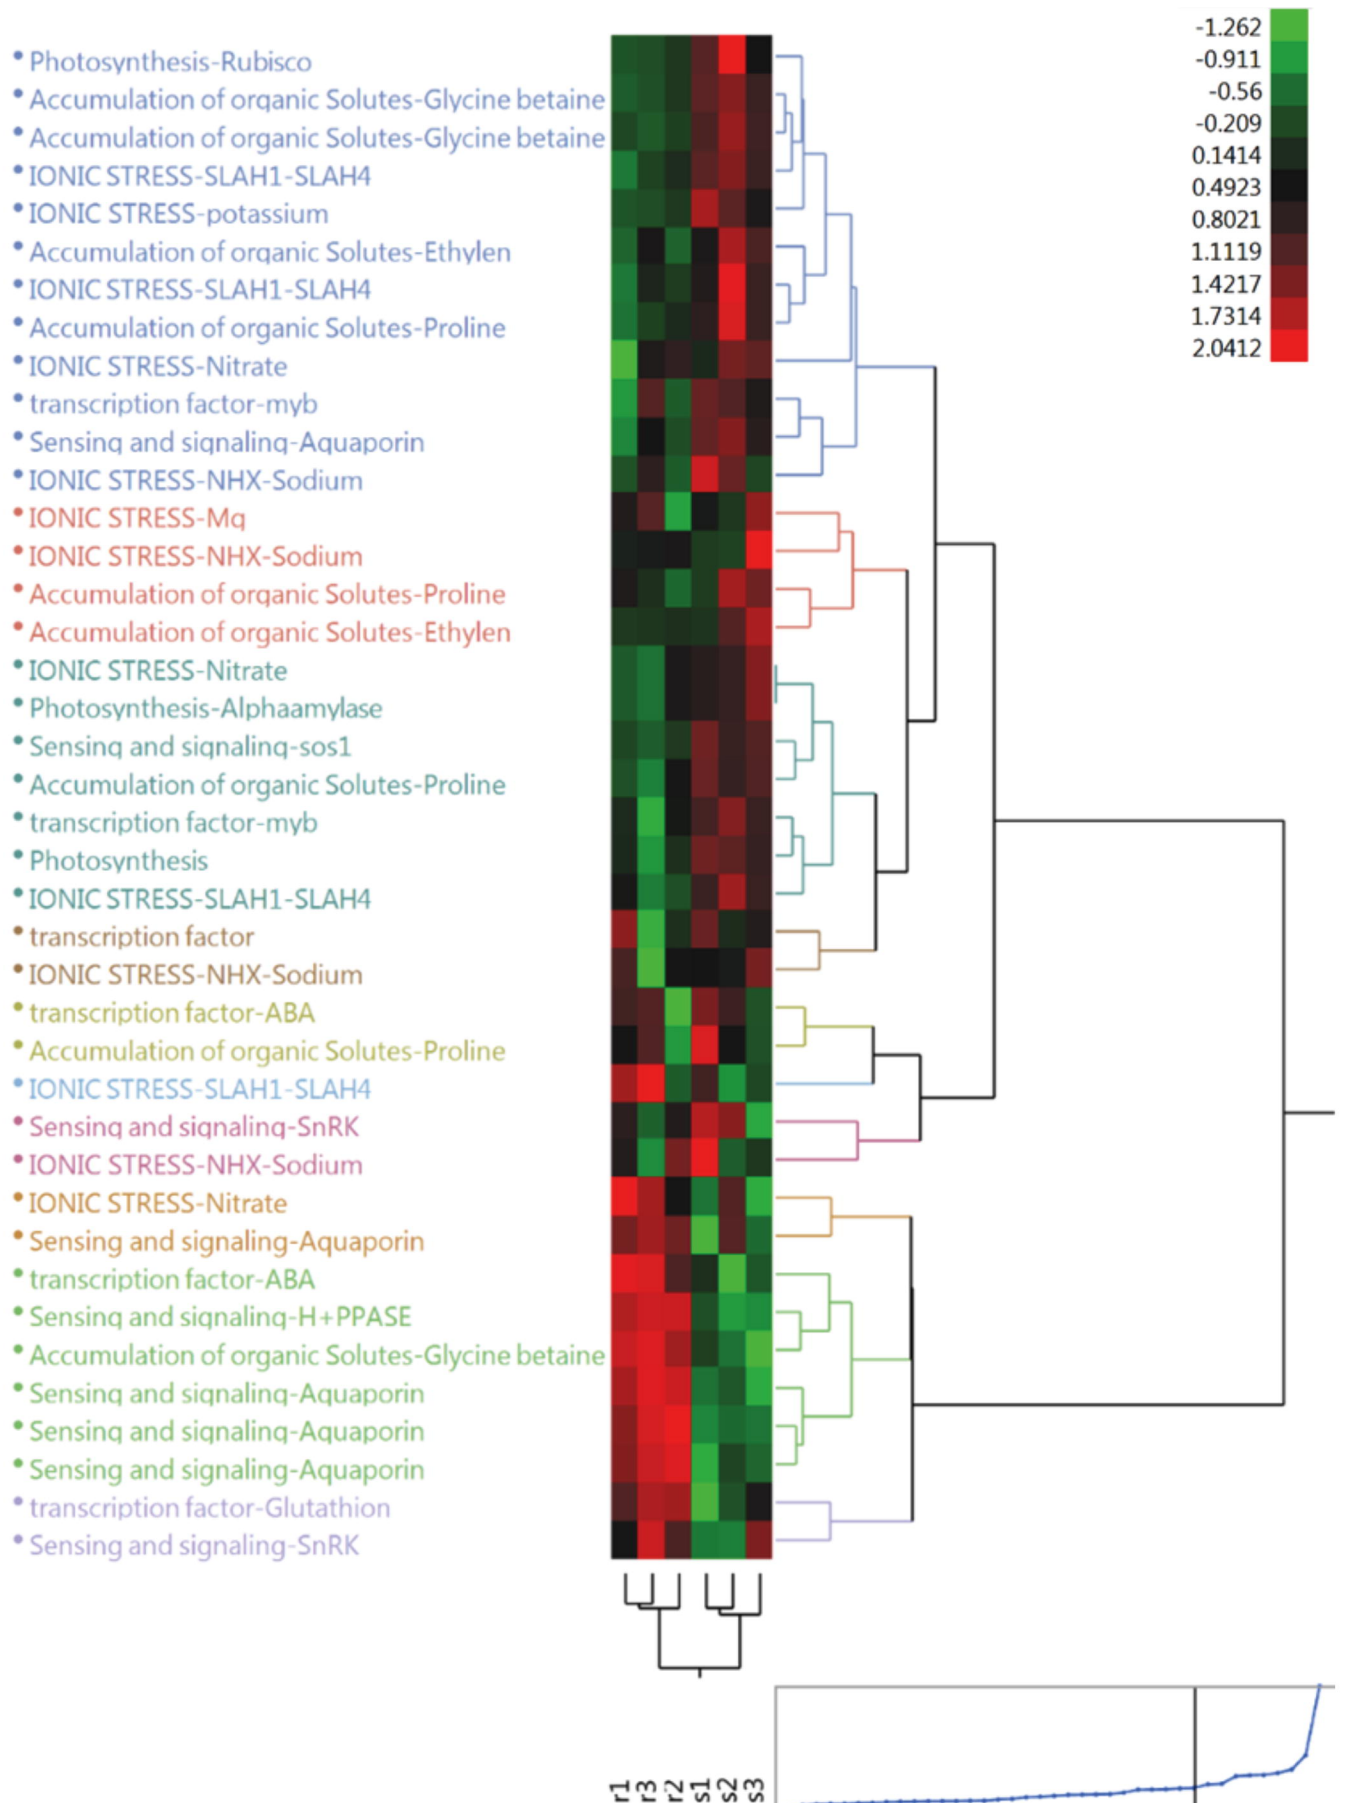

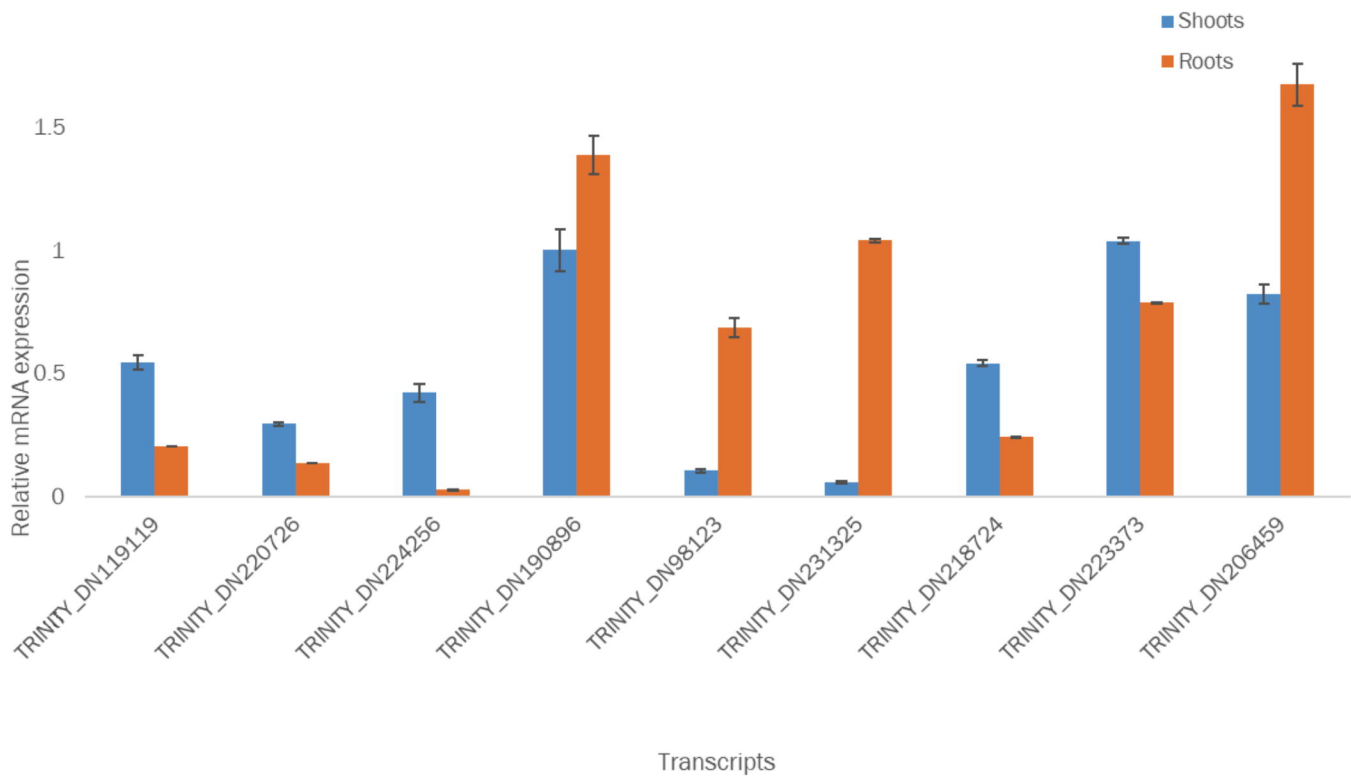

Source: https://www.biorxiv.org/content/10.1101/2020.03.17.995720v2.full.pdf
