# Supplementary material for: Beyond the greenhouse: coupling environmental and salt stress response reveals unexpected global transcriptional regulatory networks in Salicornia bigelovii
Source: bioRxiv or medRxiv preprint supplement (doi:10.1101/2020.03.17.995720), 2020-03-20
Supplement: Supplementary file [file media-1.pdf]

## Beyond the greenhouse: coupling environmental and salt stress response reveals unexpected global transcriptional regulatory networks in *Salicornia bigelovii*

Houda Chelaifa<sup>1,5</sup>, Manikandan Vinu<sup>4</sup>, Massar Dieng<sup>4</sup>, Youssef Idaghdour<sup>4</sup>, Ayesha Hasan<sup>1,2,3</sup>, and Hector H. Hernandez<sup>1,2,5\*</sup>

<sup>1</sup>Department of Biomedical Engineering, Khalifa University, Abu Dhabi, United Arab Emirates

<sup>2</sup>Center for Membrane and Advanced Water Technology, Khalifa University, Abu Dhabi, United Arab Emirates

<sup>3</sup>Applied Genomic Laboratory, Khalifa University, Abu Dhabi, United Arab Emirates

<sup>4</sup>Program in Biology, New York University Abu Dhabi, Abu Dhabi, United Arab Emirates

<sup>5</sup>Microbial Environmental and Chemical Ecology Laboratory, Khalifa University, Abu Dhabi, United Arab Emirates

### \* Correspondence:

Hector H. Hernandez

hector.hernandez@ku.ac.ae

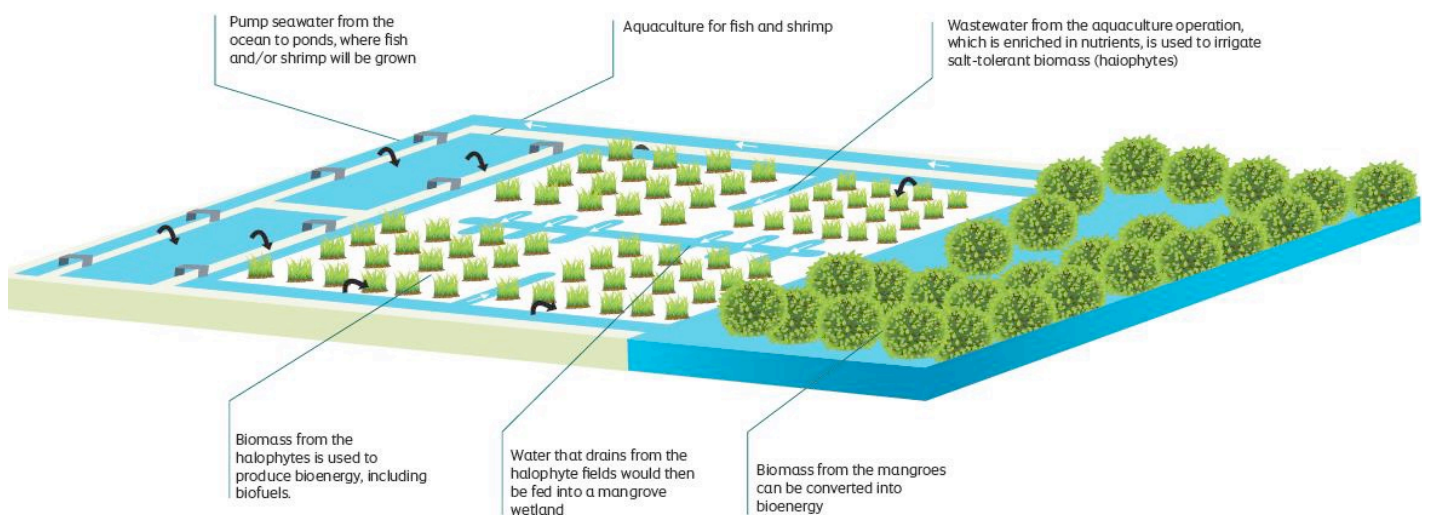

**Figure S1.** Schematic diagram of the SEAS pilot facility at Masdar Campus, Khalifa University. The pilot facility combines aquaculture, halo-agriculture, and mangrove silviculture for the production of sustainable biofuels for aviation and other high value byproducts such as seafood and animal fodder.

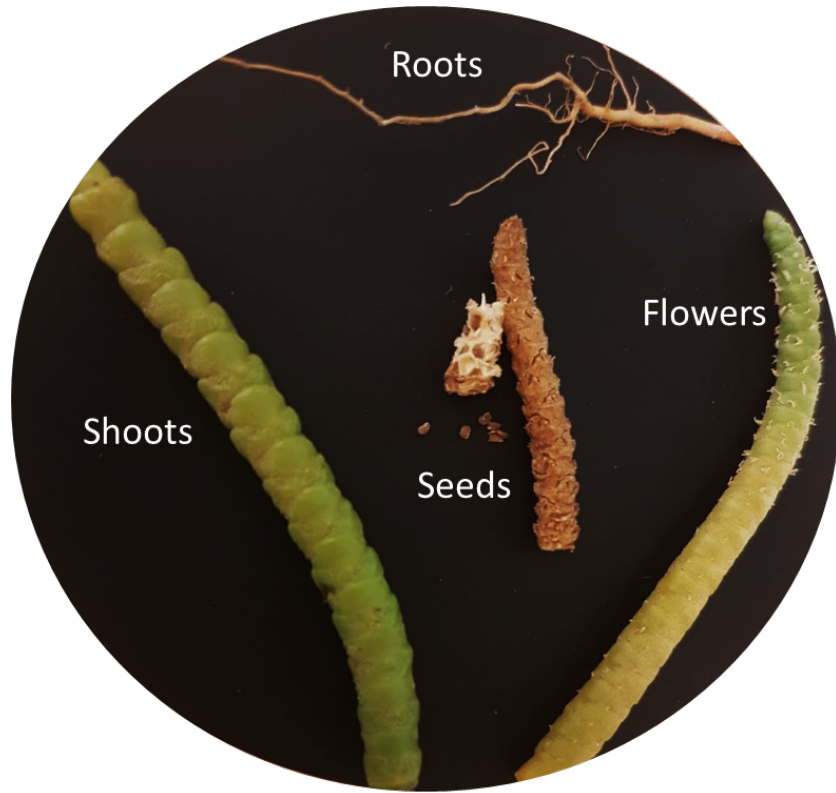

**Figure S2.** Image showing the different tissues used in the *S. bigelovii* transcriptome analysis. The *S. bigelovii* plant roots extend 20-35 cm into the soil, shoot height ranges from 9-60 cm, flowers are 0.6-0.7 mm, and seeds 1-1.5 mm in length.

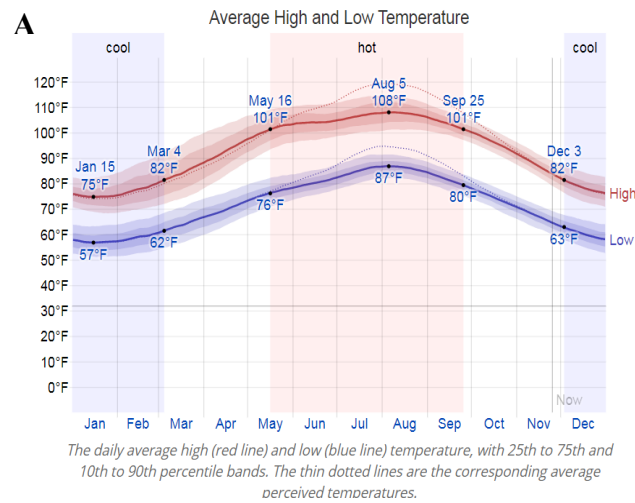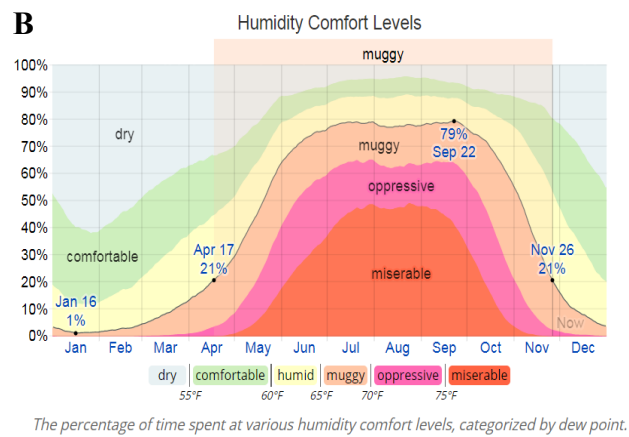

**Figure S3.** Meteorological data at the SEAS pilot facility as reported by the Abu Dhabi International Airport (24°25'59"N 54°39'04"E). **(A)** Graph represents the average monthly high (red line) and low (blue line) temperatures. **(B)** Image represents the monthly relative humidity levels with average time spent at various comfort levels.



**Table S1.** Salinity and ion concentration of the effluent water in the Field 1 of SEAS pilot facility measured between March and August 2017.

| <b>Ions</b>           | <b>March<br/>(g L<sup>-1</sup>)</b> | <b>April<br/>(g L<sup>-1</sup>)</b> | <b>May<br/>(g L<sup>-1</sup>)</b> | <b>June<br/>(g L<sup>-1</sup>)</b> | <b>July<br/>(g L<sup>-1</sup>)</b> | <b>August<br/>(g L<sup>-1</sup>)</b> | <b>Average<br/>(g L<sup>-1</sup>)</b> |
|-----------------------|-------------------------------------|-------------------------------------|-----------------------------------|------------------------------------|------------------------------------|--------------------------------------|---------------------------------------|
| Na                    | 11.77                               | 14.57                               | 14.57                             | 16.24                              | 16.63                              | 16.97                                | 15.12 ±1.9                            |
| Cl                    | 18.79                               | 20.47                               | 19.47                             | 21.98                              | 21.77                              | 22.00                                | 20.74 ±1.3                            |
| Mg                    | 1.16                                | 1.24                                | 1.24                              | 1.35                               | 1.35                               | 1.42                                 | 1.29 ±0.09                            |
| Ca                    | 0.65                                | 0.70                                | 0.70                              | 0.73                               | 0.73                               | 0.83                                 | 0.72 ±0.06                            |
| K                     | 0.53                                | 0.52                                | 0.52                              | 0.54                               | 0.54                               | 0.66                                 | 0.55 ±0.05                            |
| Br                    | 0.06                                | 0.06                                | 0.06                              | 0.07                               | 0.07                               | 0.09                                 | 0.07 ±0.01                            |
| SO4                   | 0.31                                | 0.32                                | 0.32                              | 0.38                               | 0.38                               | 0.39                                 | 0.35 ±0.03                            |
| NO2                   | 0.00                                | 0.00                                | 0.00                              | 0.01                               | 0.01                               | 0.01                                 | 0.01 ±0.02                            |
| <b>Water Salinity</b> | <b>34.57 ±0.76</b>                  | <b>38.59 ±0.15</b>                  | <b>36.21 ±0.79</b>                | <b>41.45 ±0.83</b>                 | <b>41.74 ±0.75</b>                 | <b>42.56 ±1.1</b>                    |                                       |

**Table S2.** Primer sense and anti-sense primer sequences used in the qRT-PCR assay for validation of differential expression of specific genes.

| Transcript ID    | Sequence(5'to3')     | Reverse               | Description                                                                                      |
|------------------|----------------------|-----------------------|--------------------------------------------------------------------------------------------------|
| TRINITY_DN119119 | CGAACCTTCGAAGATGGAGA | CTTATTTTCGTGTGCCGGTTT | <i>Beta vulgaris</i> subsp. <i>vulgaris</i> probable cation transporter HKT6                     |
| TRINITY_DN220726 | CGAACCTTCGAAGATGGAGA | CTTATTTTCGTGTGCCGGTTT | <i>Salicornia brachiata</i> salt overly sensitive 1 mRNA, complete CDS                           |
| TRINITY_DN207378 | TGTACCAATGGCTCCAAACA | GGGGTTGTGATTCTGCTGAT  | <i>Salicornia bigelovii</i> Na <sup>+</sup> /H <sup>+</sup> antiporter (NHX1) mRNA, complete CDS |
| TRINITY_DN190896 | CCTCTCTCCTTGGCTTCCT  | ACTTTGGTGAGGTTGGTGCT  | <i>Chenopodium quinoa</i> abscisic stress-ripening protein 3-like, mRNA                          |
| TRINITY_DN98123  | CCCCTCCACAGTGTTCCTTA | ACAAACCAAGCCACACAACA  | <i>Beta vulgaris</i> subsp. <i>vulgaris</i> probable aquaporin NIP 5, mRNA                       |
| TRINITY_DN231325 | AGCACCAGCTTCTGGACCTA | TTCAAAAGCCATGTGCTCAG  | <i>Kalidium foliatum</i> betaine aldehyde dehydrogenase protein mRNA, complete CDS               |
| TRINITY_DN218725 | CACCCCAATAACATCGGAAC | TGACGACAACGACGAAGAAG  | Proline-rich protein PRCC (LOC104883603), transcript variant X2, mRNA                            |
| TRINITY_DN223373 | TCGCAGCAAGAGAGAGTTCA | CGTATCCAGCTTGTTGAGCA  | <i>Beta vulgaris</i> subsp. <i>vulgaris</i> proline-rich protein P5CS                            |
| TRINITY_DN206459 | TGAATCATCCTGTGCTGCTC | CTGGCTCAATCTCGTTGACA  | <i>Salicornia europaea</i> vacuolar H <sup>+</sup> -pyrophosphatase mRNA, complete CDS           |
